# Supplementary material for: Facile synthesis and nematicidal activity evaluation of thiophosphinyl amide [(Pz)2P(S)NHR] and thiophosphonyl diamide [(Pz)P(S)(NHR)2] (Pz = 1,3,5-trimethylpyrazole, R = biphenyl derivatives)
Source: Royal Society of Chemistry journal article supplement (doi:10.1039/d1ra06232h), 2021-01-01
Supplement: d1ra06232h1.pdf [file d1ra06232h1.pdf]

**Facile synthesis and nematicidal activity evaluation of thiophosphinyl  
amide [(Pz)<sub>2</sub>P(S)NHR] and thiophosphonyl diamide [(Pz)P(S)(NHR)<sub>2</sub>] (Pz =  
1,3,5-trimethylpyrazole, R = Biphenyl derivatives)**

Xiao Chen<sup>a</sup>, Xiaogang Lu<sup>a</sup>, Haibo Liu<sup>a</sup>, Hongmei Wang<sup>\*a</sup>, Chengxin Pei<sup>\*a</sup>

<sup>a</sup>State Key Laboratory of NBC Protection for Civilian. Beijing 102205, China

## Contents

|                                                                                          |    |
|------------------------------------------------------------------------------------------|----|
| 1. <sup>1</sup> H, <sup>13</sup> C and <sup>31</sup> P NMR spectra of <b>1a-2h</b> ..... | 2  |
| 2. IR spectra of <b>1a-2h</b> .....                                                      | 26 |
| 3. Mass spectra of <b>1a-2h</b> .....                                                    | 34 |

# 1. $^1\text{H}$ , $^{13}\text{C}$ and $^{31}\text{P}$ NMR spectra of **1a-2h**.

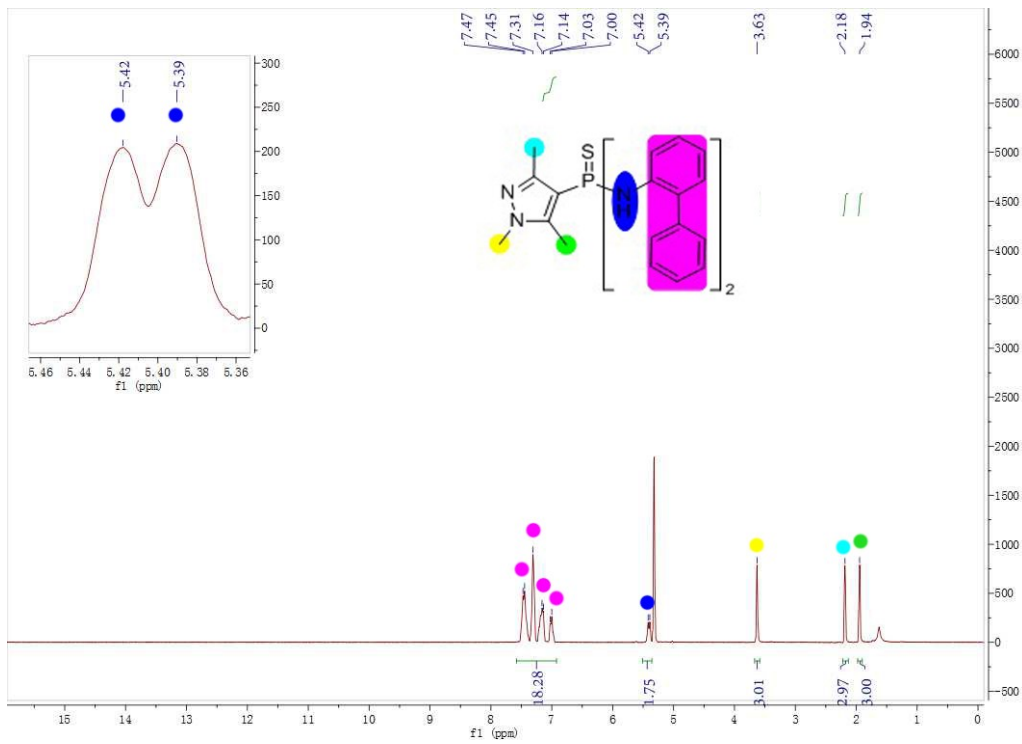

Fig. 1  $^1\text{H}$  NMR spectrum of **1a** (300 MHz,  $\text{CD}_2\text{Cl}_2$ , 298 K).

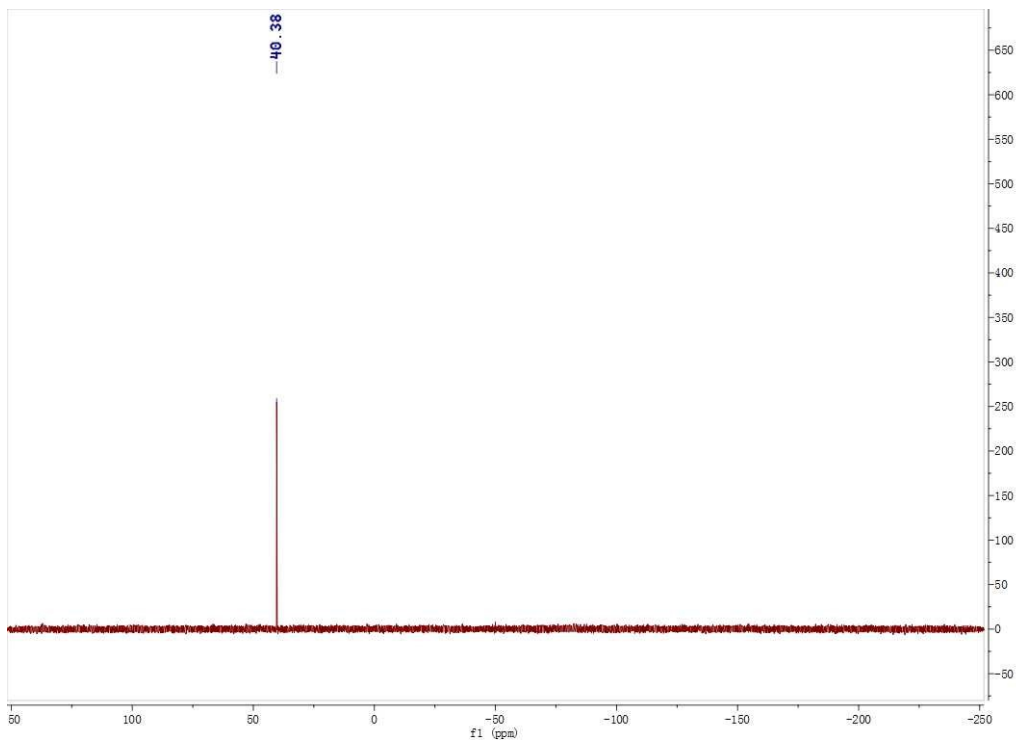

Fig. 2  $^{31}\text{P}$  NMR spectrum of **1a** (121.5 MHz,  $\text{CD}_2\text{Cl}_2$ , 298 K).

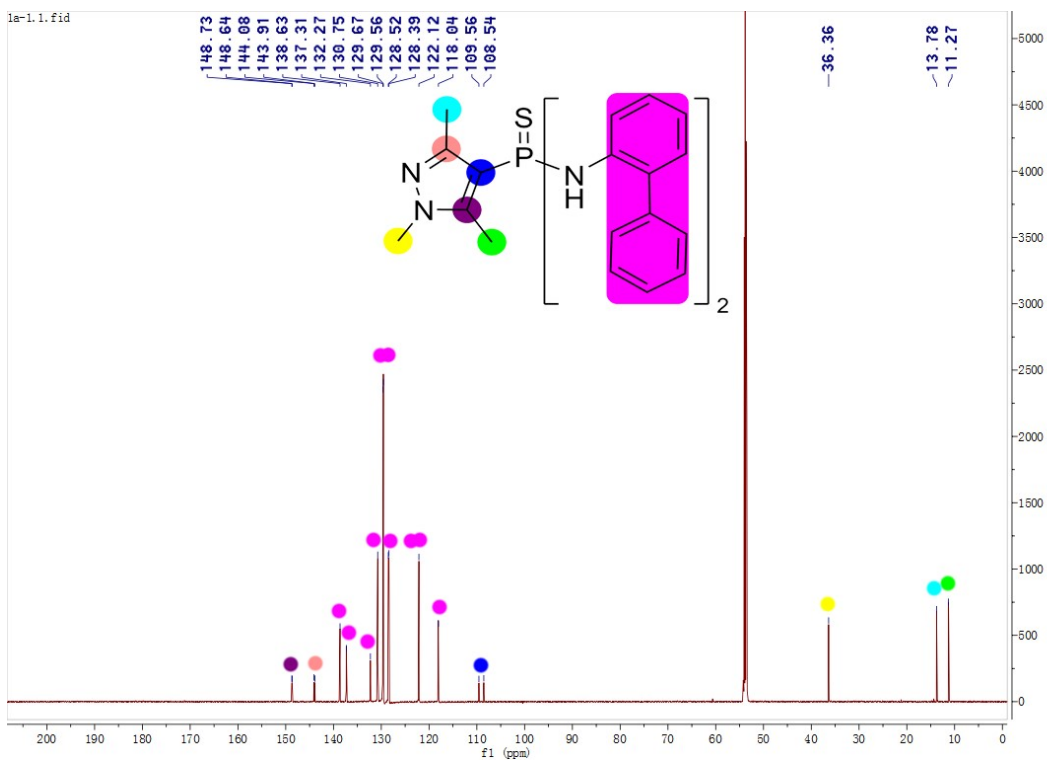

Fig. 3  $^{13}\text{C}$  NMR spectrum of **1a** (150 MHz,  $\text{CD}_2\text{Cl}_2$ , 298 K).

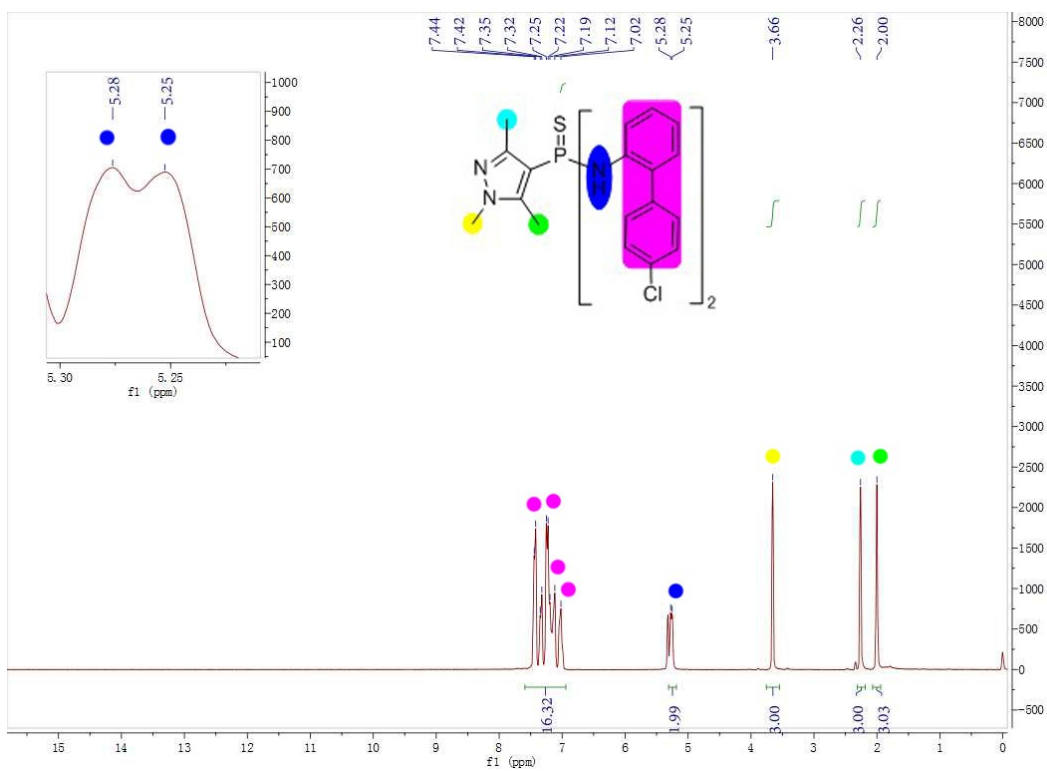

Fig. 4  $^1\text{H}$  NMR spectrum of **1b** (300 MHz,  $\text{CD}_2\text{Cl}_2$ , 298 K).

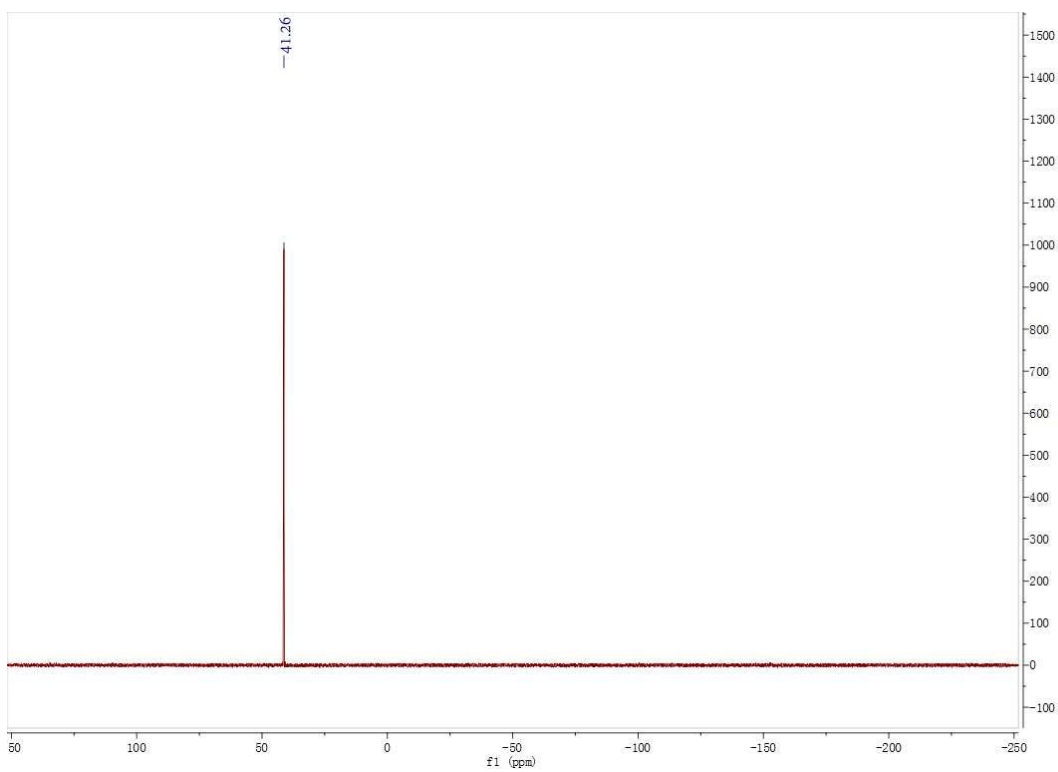

Fig. 5 <sup>31</sup>P NMR spectrum of **1b** (121.5 MHz, CD<sub>2</sub>Cl<sub>2</sub>, 298 K).

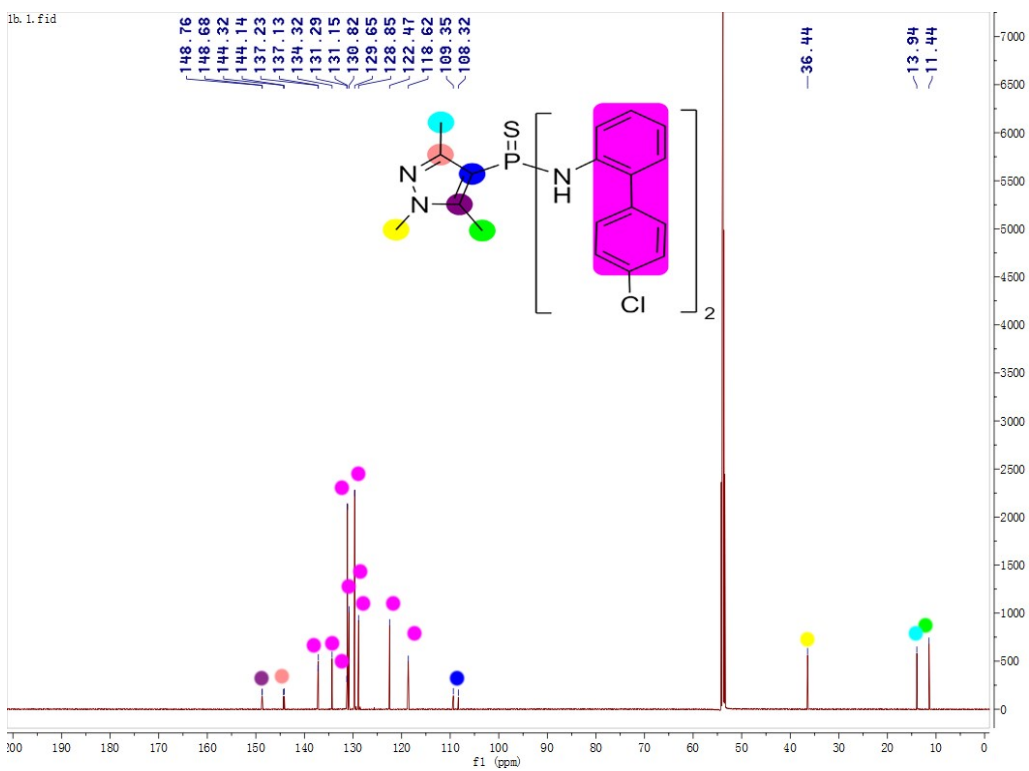

Fig. 6 <sup>13</sup>C NMR spectrum of **1b** (150 MHz, CD<sub>2</sub>Cl<sub>2</sub>, 298 K).

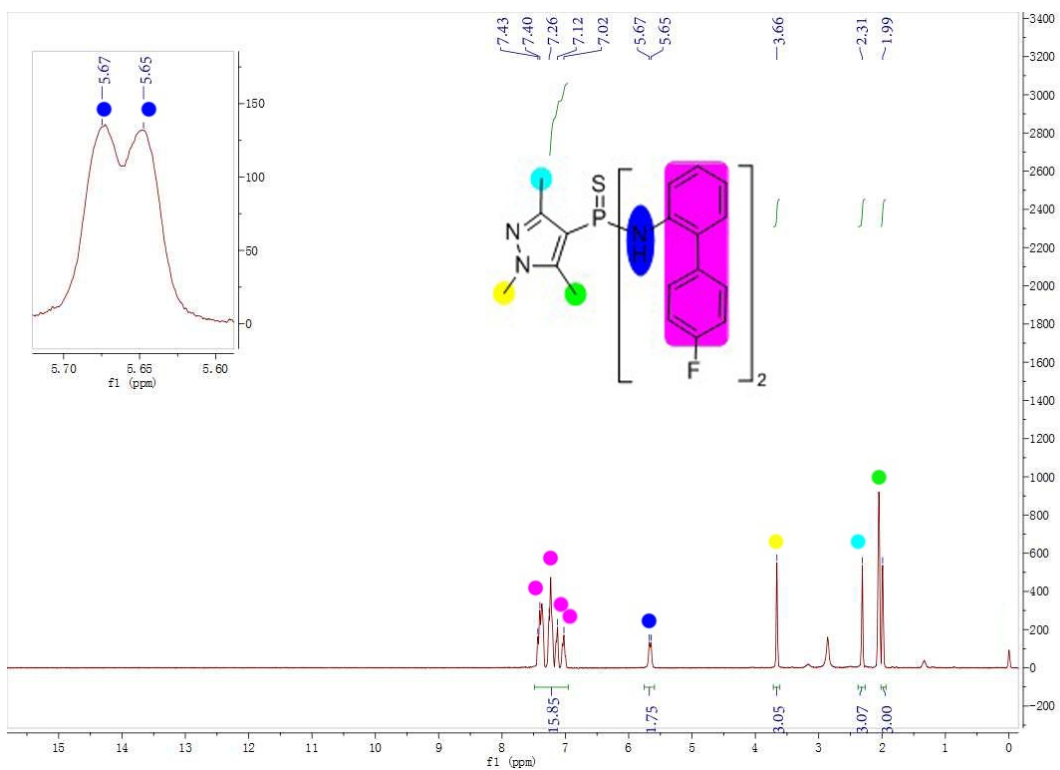

Fig. 7  $^1\text{H}$  NMR spectrum of **1c** (300 MHz,  $\text{CD}_3\text{CN}$ , 298 K).

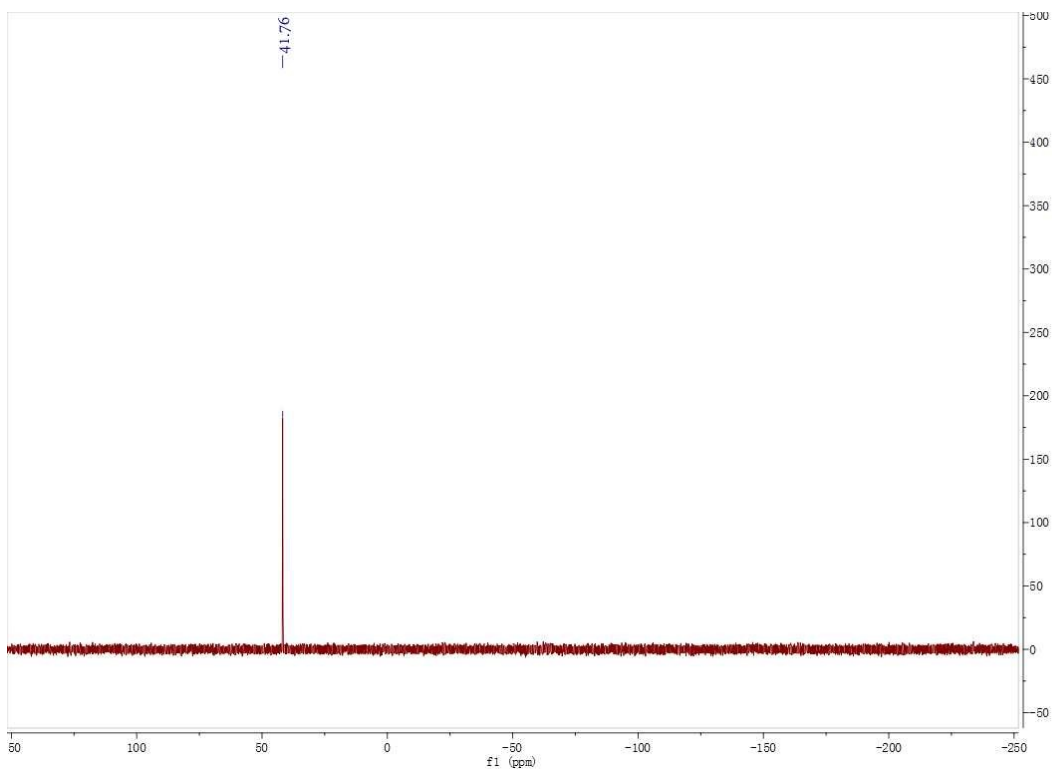

Fig. 8  $^{31}\text{P}$  NMR spectrum of **1c** (121.5 MHz,  $\text{CD}_3\text{CN}$ , 298 K).

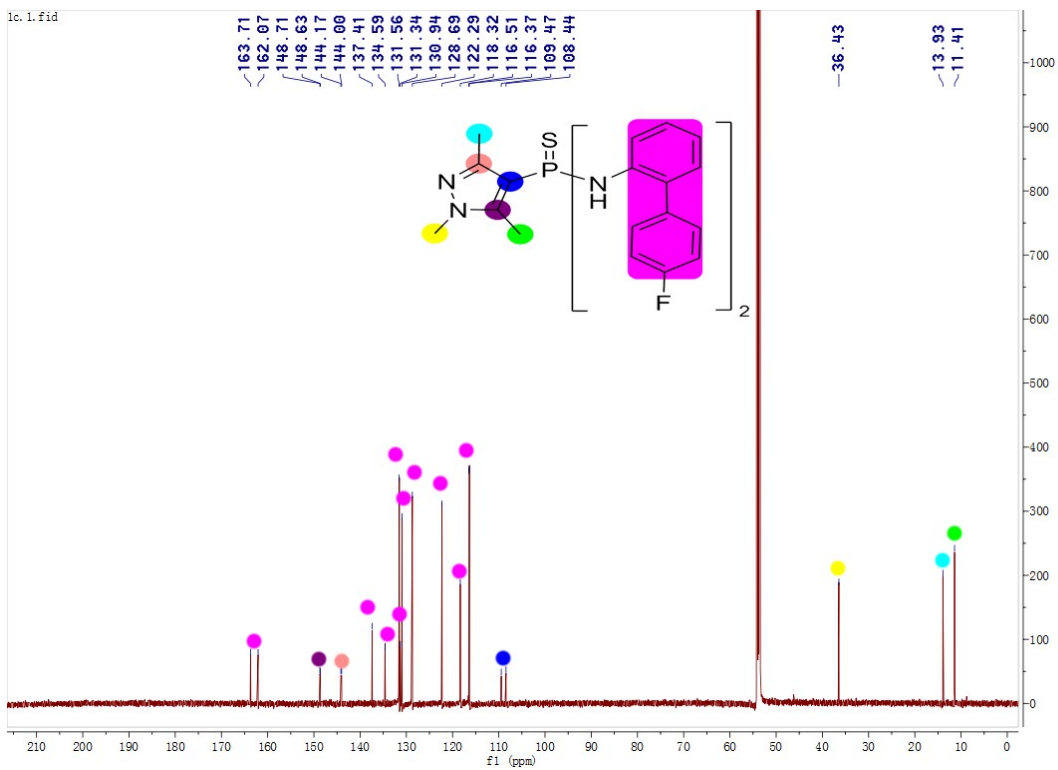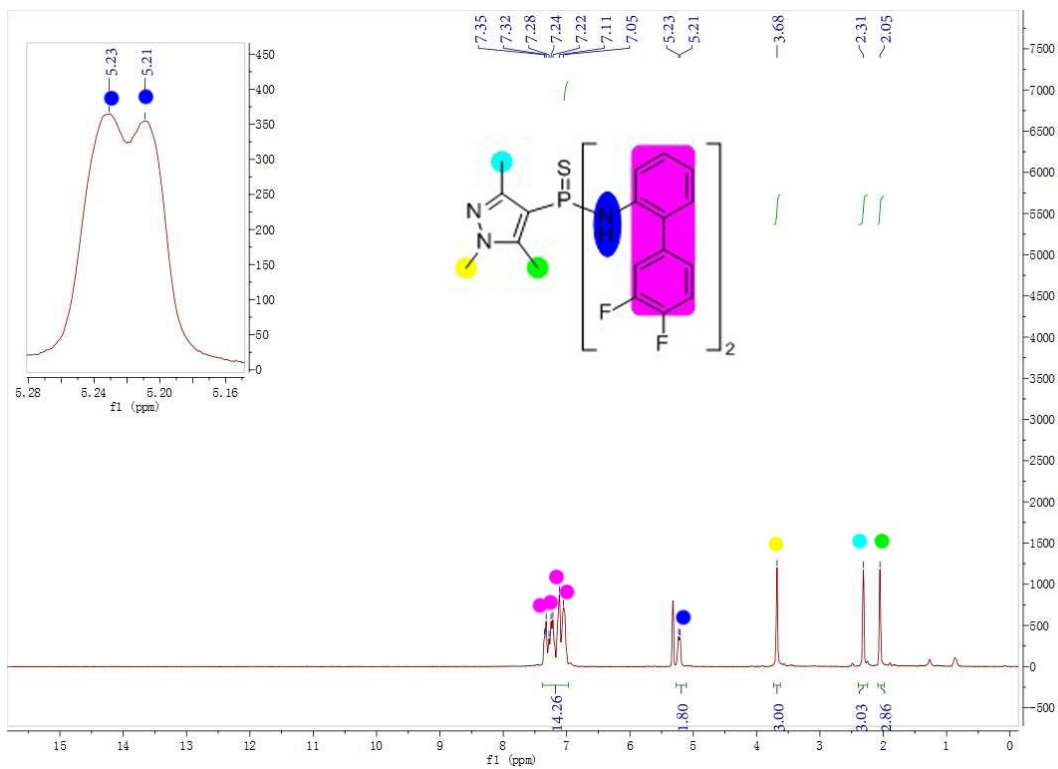

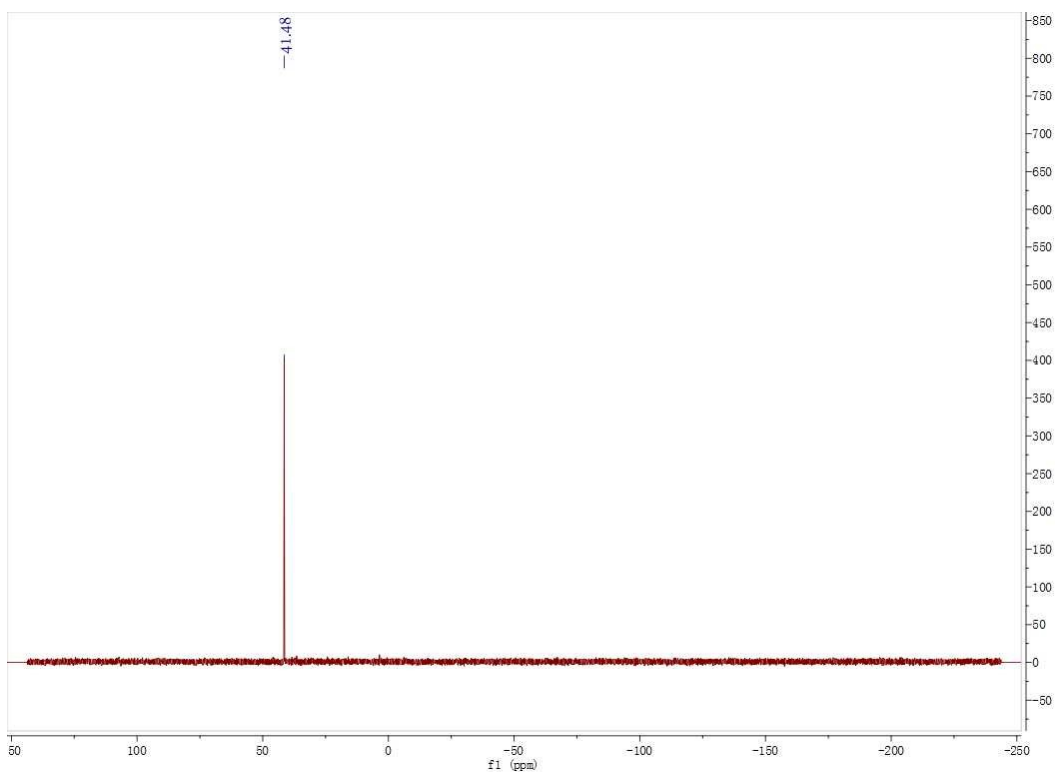

Fig. 11 <sup>31</sup>P NMR spectrum of **1d** (121.5 MHz, CD<sub>2</sub>Cl<sub>2</sub>, 298 K).

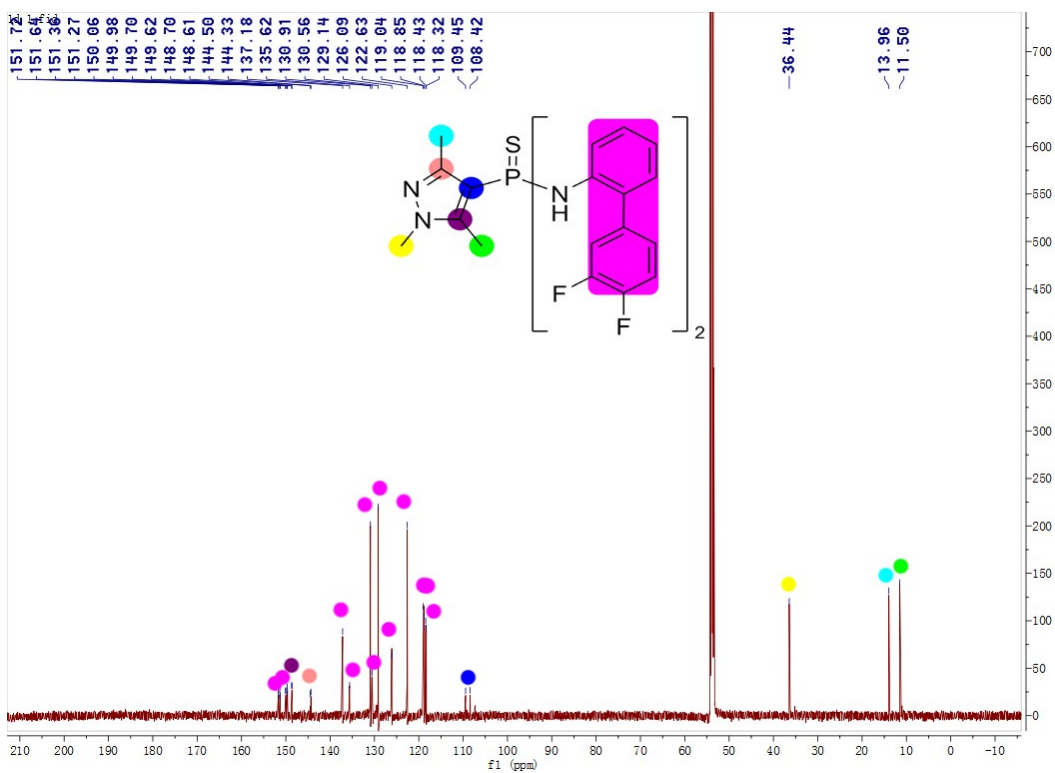

Fig.12 <sup>13</sup>C NMR spectrum of **1d** (150 MHz, CD<sub>2</sub>Cl<sub>2</sub>, 298 K).

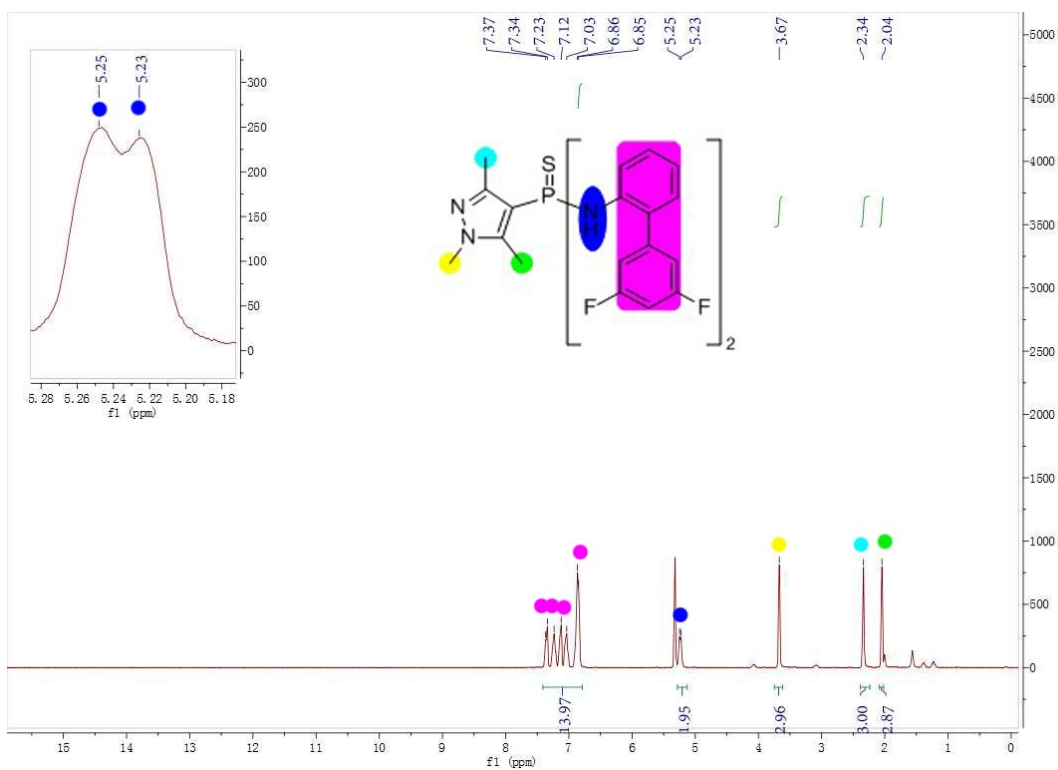

Fig. 13  $^1\text{H}$  NMR spectrum of **1e** (300 MHz,  $\text{CD}_2\text{Cl}_2$ , 298 K).

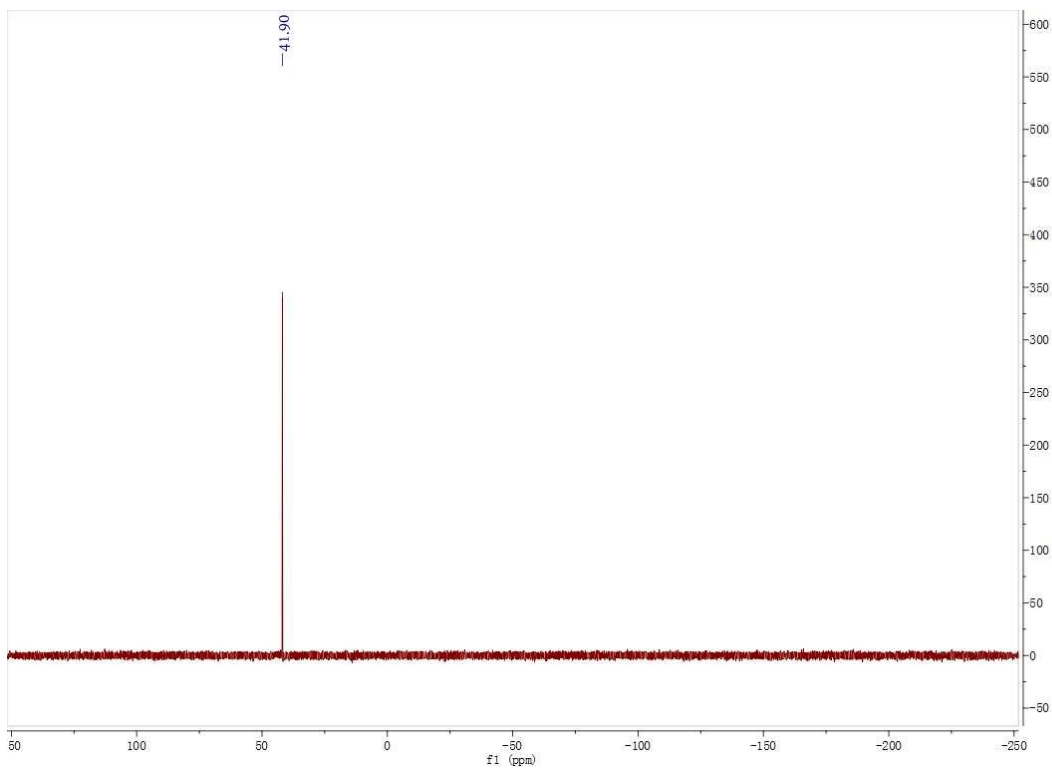

Fig. 14  $^{31}\text{P}$  NMR spectrum of **1e** (121.5 MHz,  $\text{CD}_2\text{Cl}_2$ , 298 K).



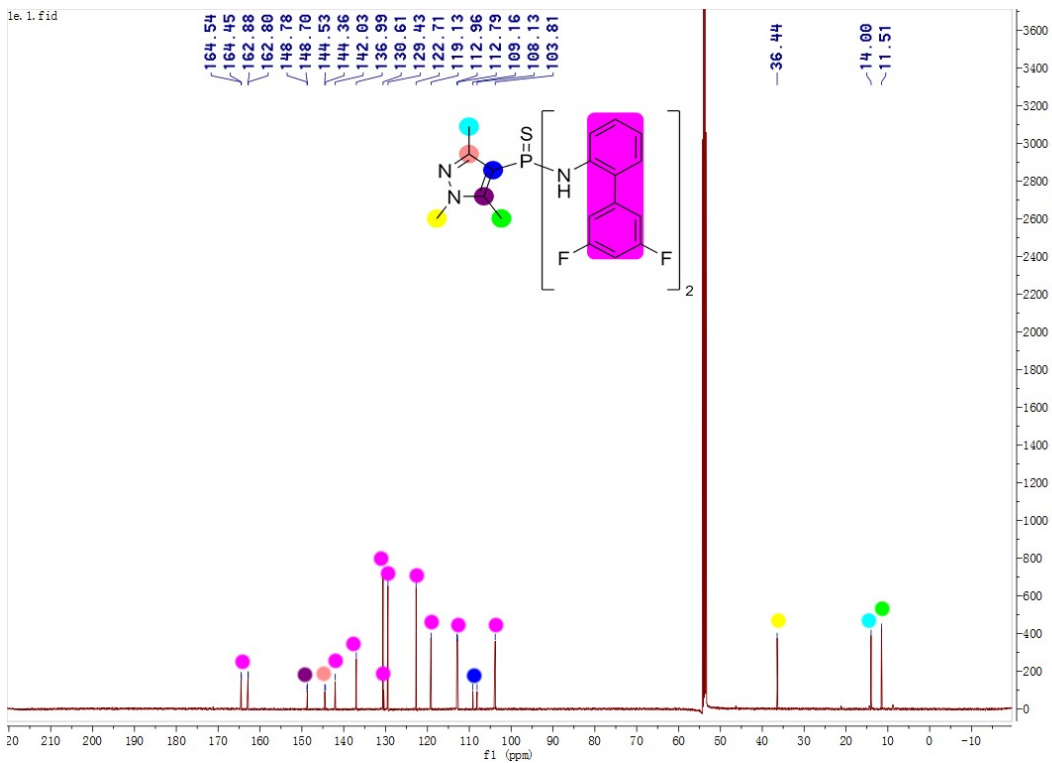

Fig. 15  $^{13}\text{C}$  NMR spectrum of **1e** (150 MHz,  $\text{CD}_2\text{Cl}_2$ , 298 K).

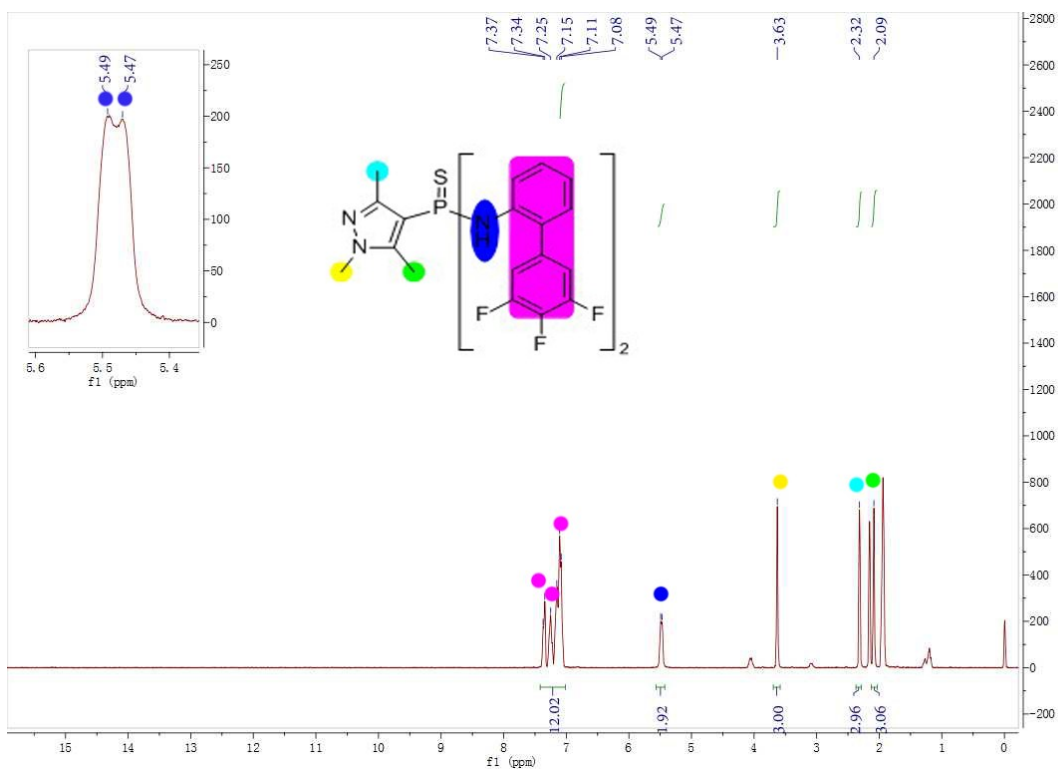

Fig. 16  $^1\text{H}$  NMR spectrum of **1f** (300 MHz,  $\text{CD}_3\text{CN}$ , 298 K).

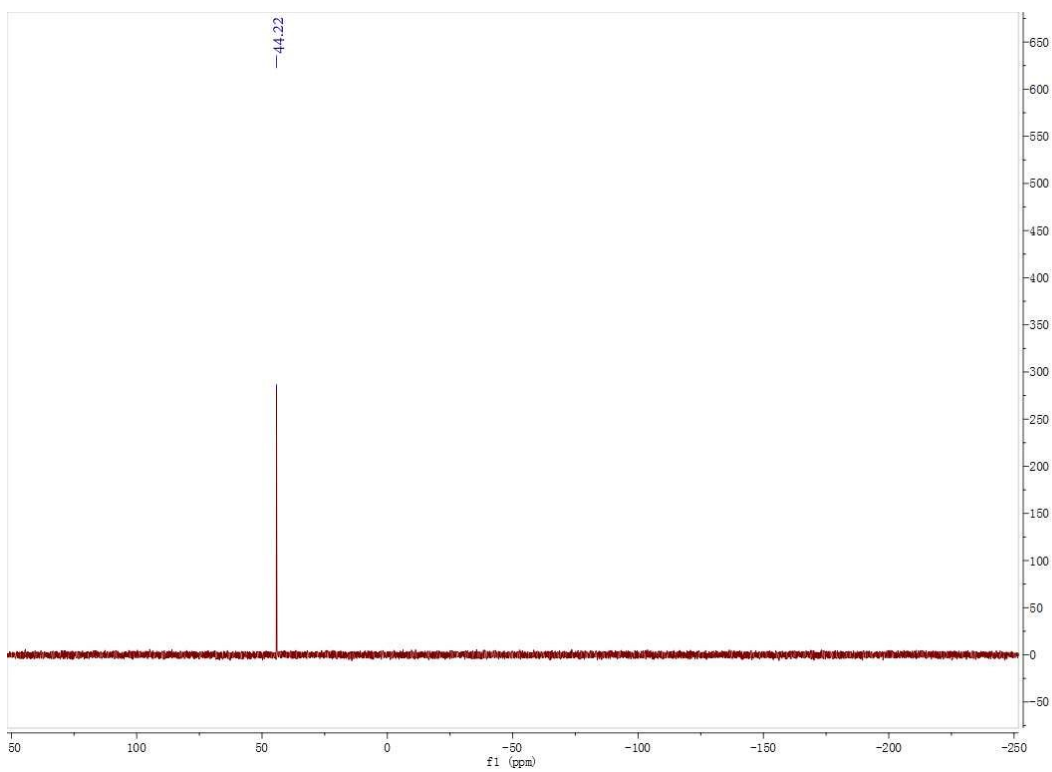

Fig. 17 <sup>31</sup>P NMR spectrum of **1f** (121.5 MHz, CD<sub>3</sub>CN, 298 K).

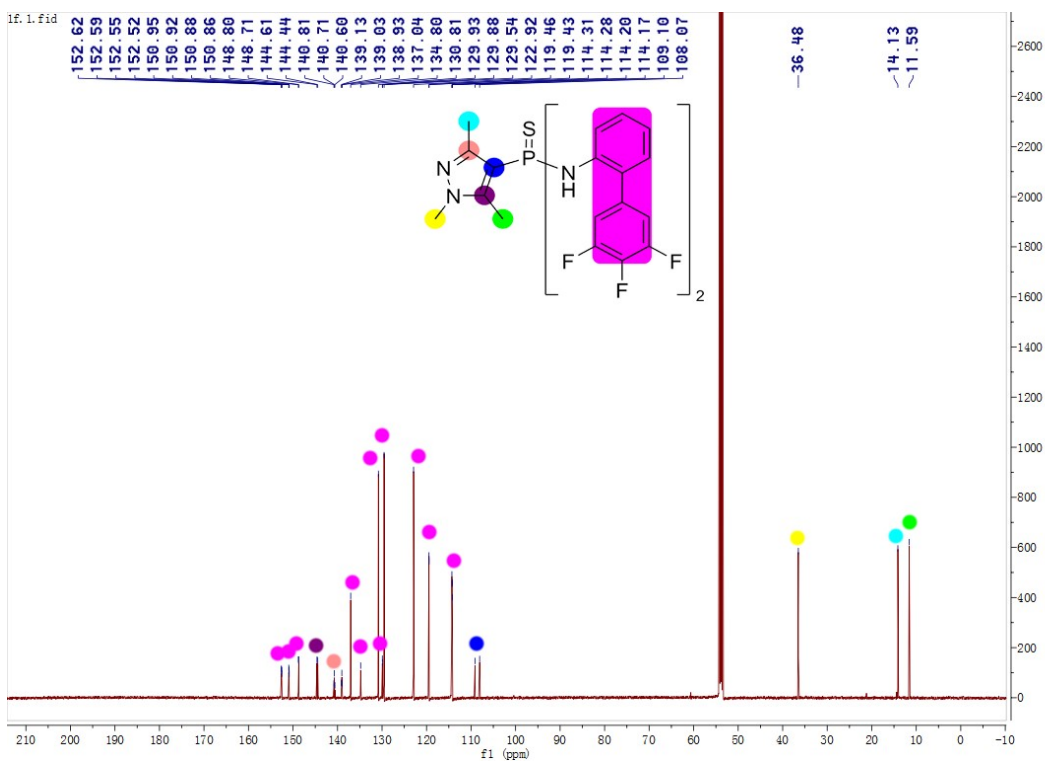

Fig. 18 <sup>13</sup>C NMR spectrum of **1f** (150 MHz, CD<sub>2</sub>Cl<sub>2</sub>, 298 K).

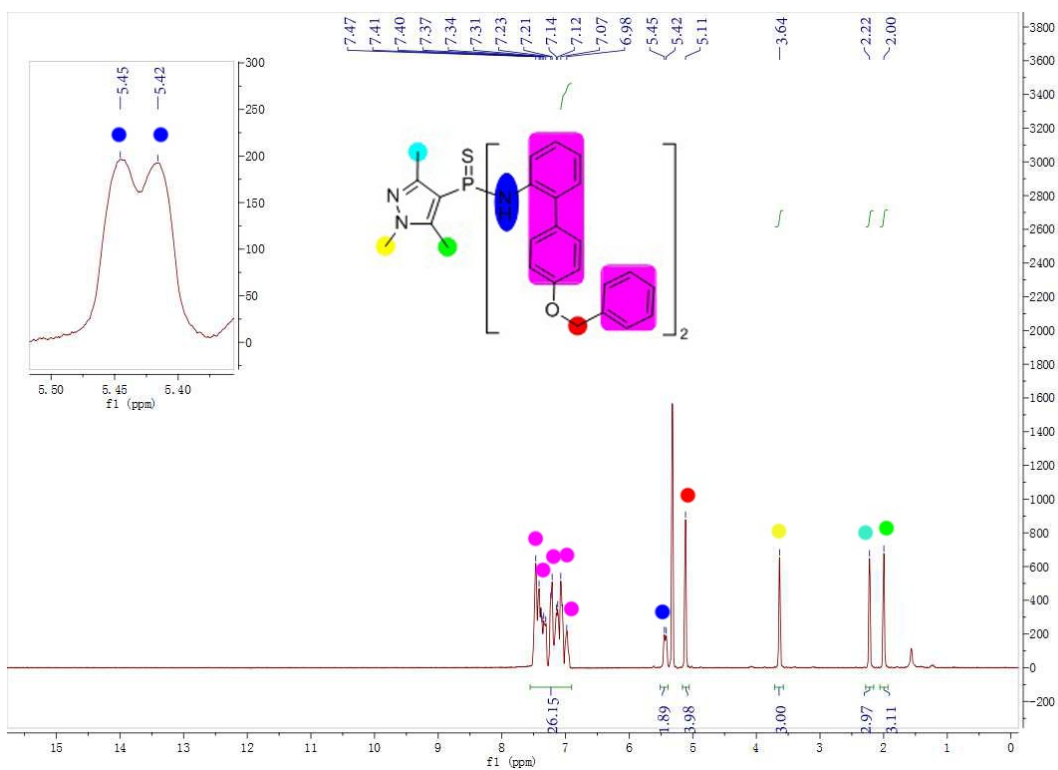

Fig. 19  $^1\text{H}$  NMR spectrum of **1g** (300 MHz,  $\text{CD}_2\text{Cl}_2$ , 298 K).

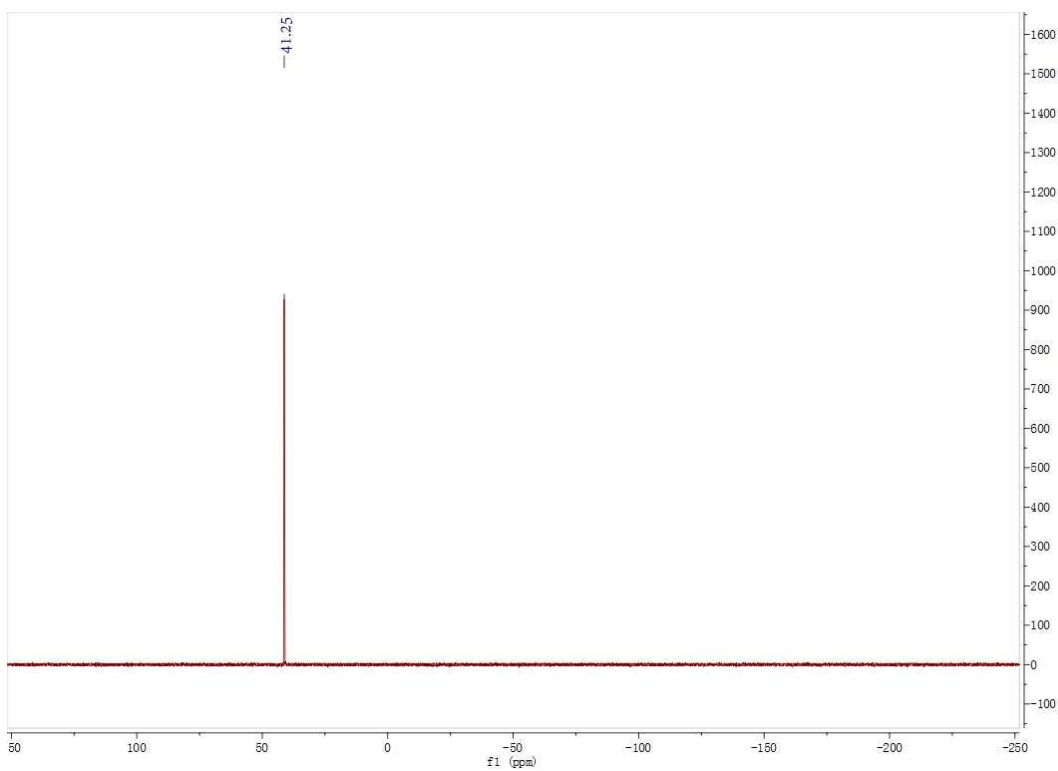

Fig. 20  $^{31}\text{P}$  NMR spectrum of **1g** (121.5 MHz,  $\text{CD}_2\text{Cl}_2$ , 298 K).

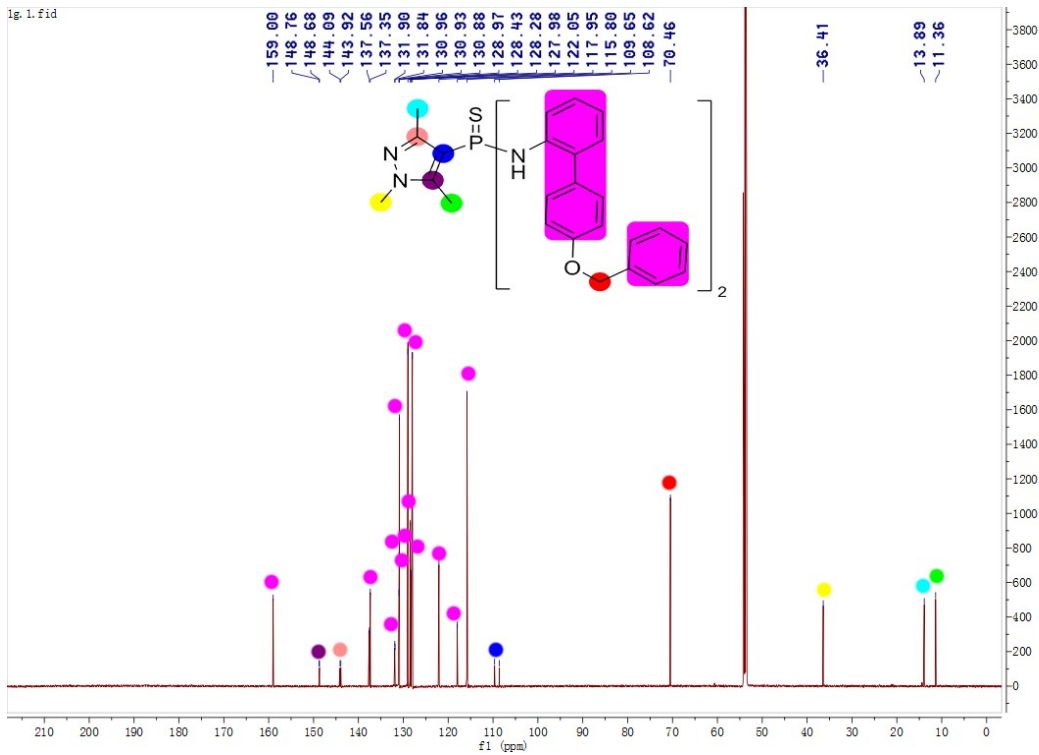

Fig. 21  $^{13}\text{C}$  NMR spectrum of **1g** (150 MHz,  $\text{CD}_2\text{Cl}_2$ , 298 K).

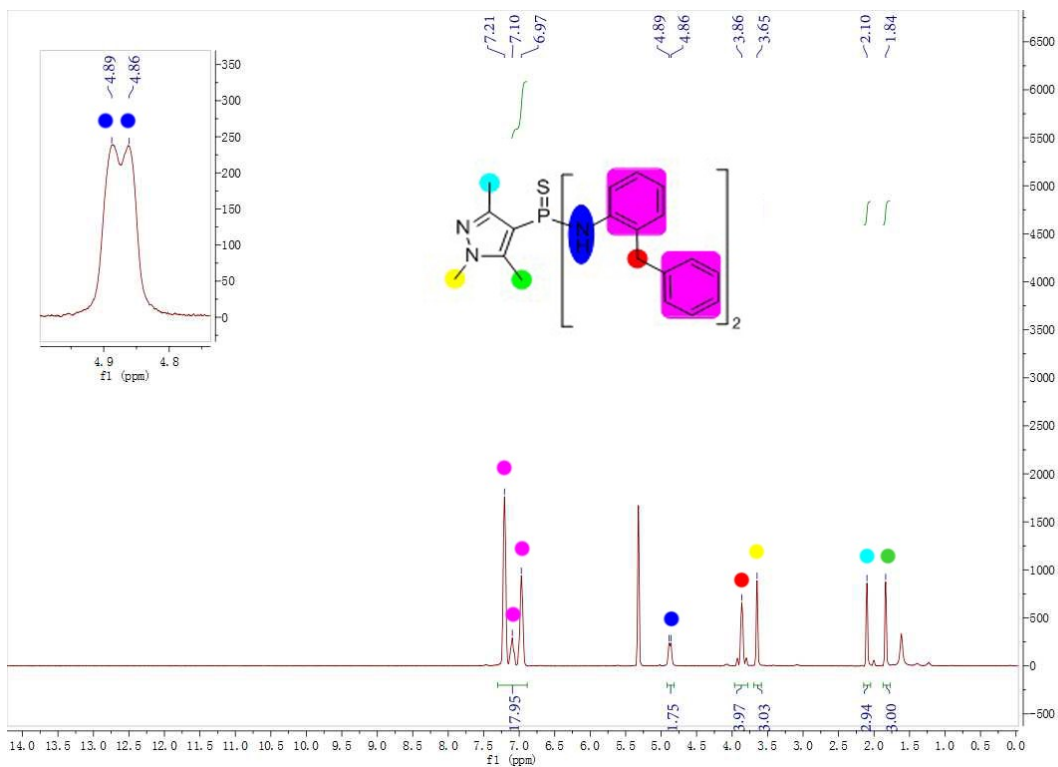

Fig. 22  $^1\text{H}$  NMR spectrum of **1h** (300 MHz,  $\text{CD}_2\text{Cl}_2$ , 298 K).

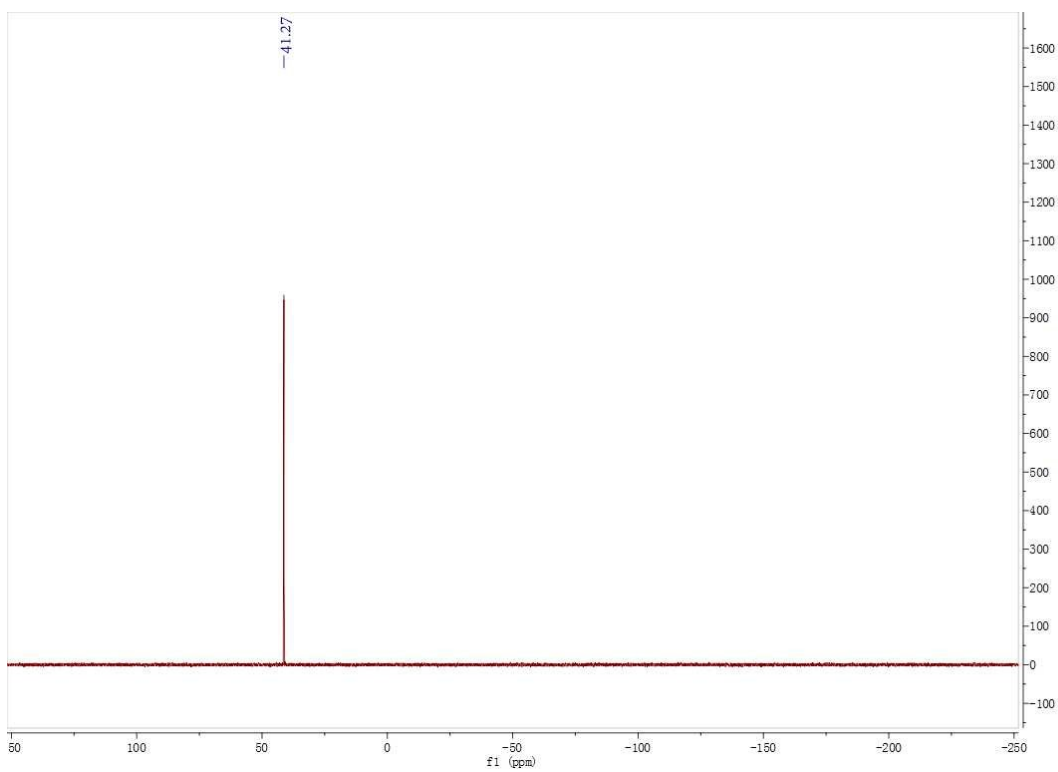

Fig. 23 <sup>31</sup>P NMR spectrum of **1h** (121.5 MHz, CD<sub>2</sub>Cl<sub>2</sub>, 298 K).

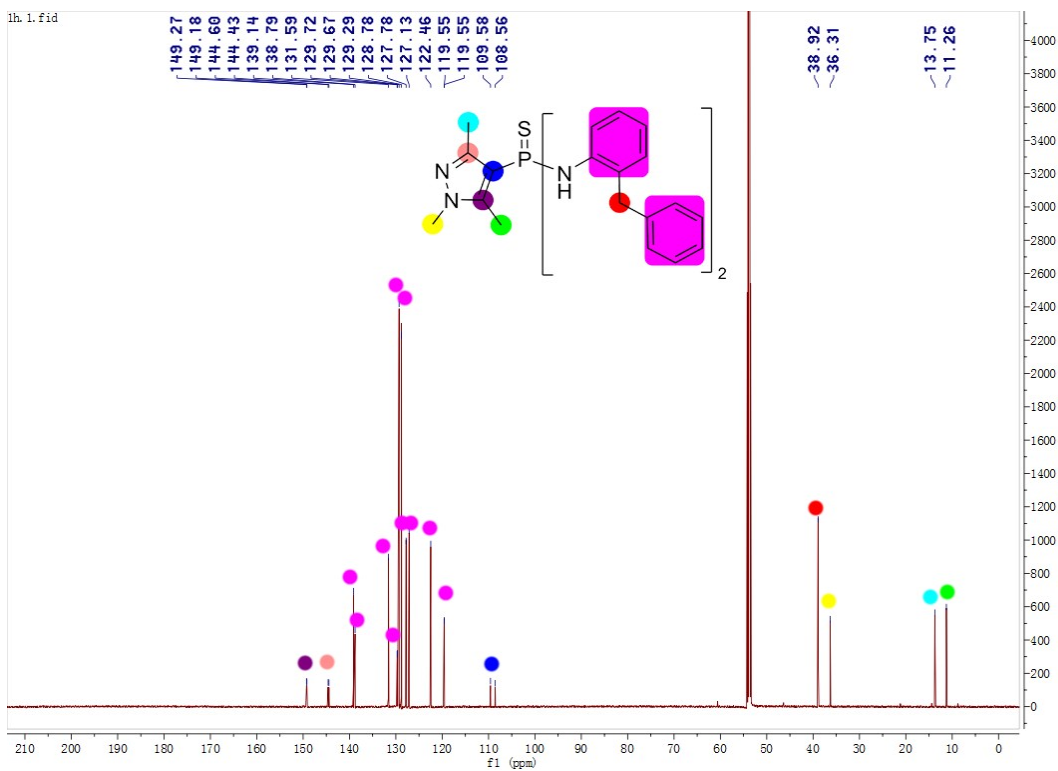

Fig. 24 <sup>13</sup>C NMR spectrum of **1h** (150 MHz, CD<sub>2</sub>Cl<sub>2</sub>, 298 K).

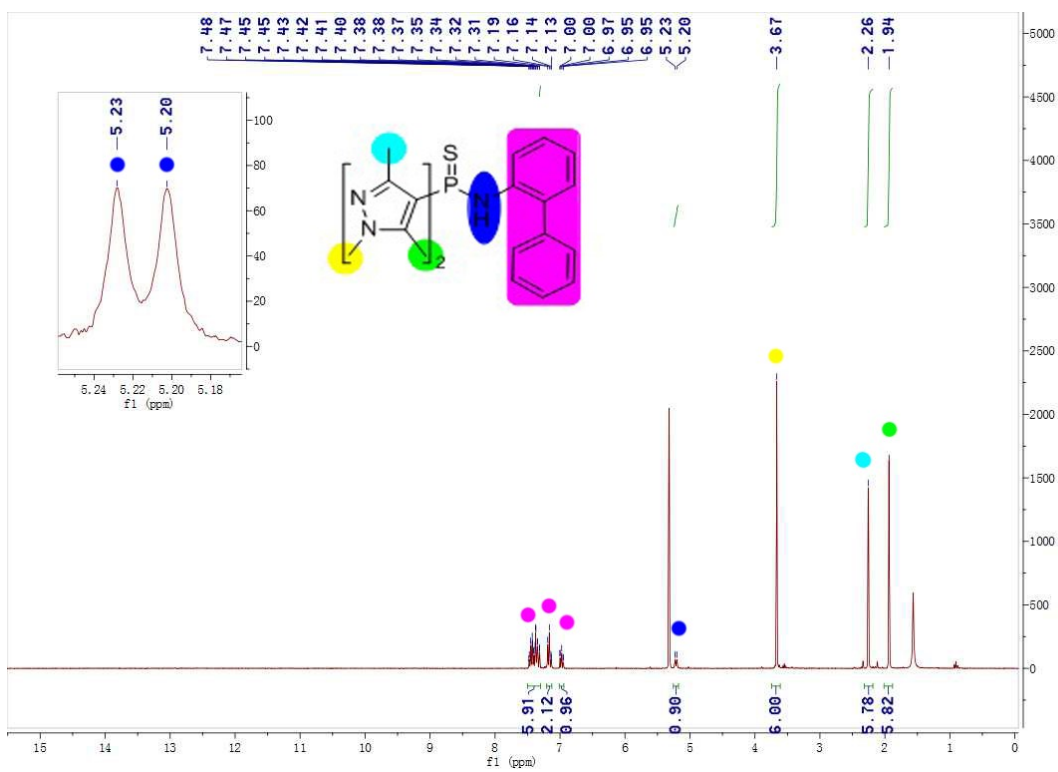

Fig. 25  $^1\text{H}$  NMR spectrum of **2a** (300 MHz,  $\text{CD}_2\text{Cl}_2$ , 298 K).

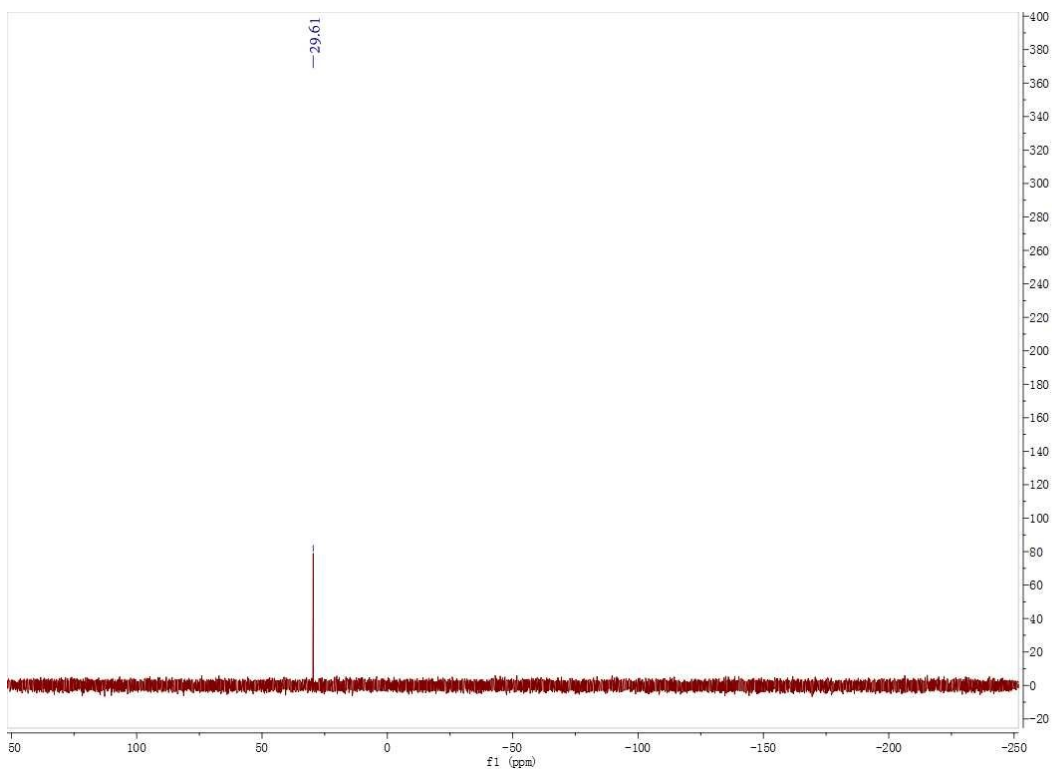

Fig. 26  $^{31}\text{P}$  NMR spectrum of **2a** (121.5 MHz,  $\text{CD}_2\text{Cl}_2$ , 298 K).

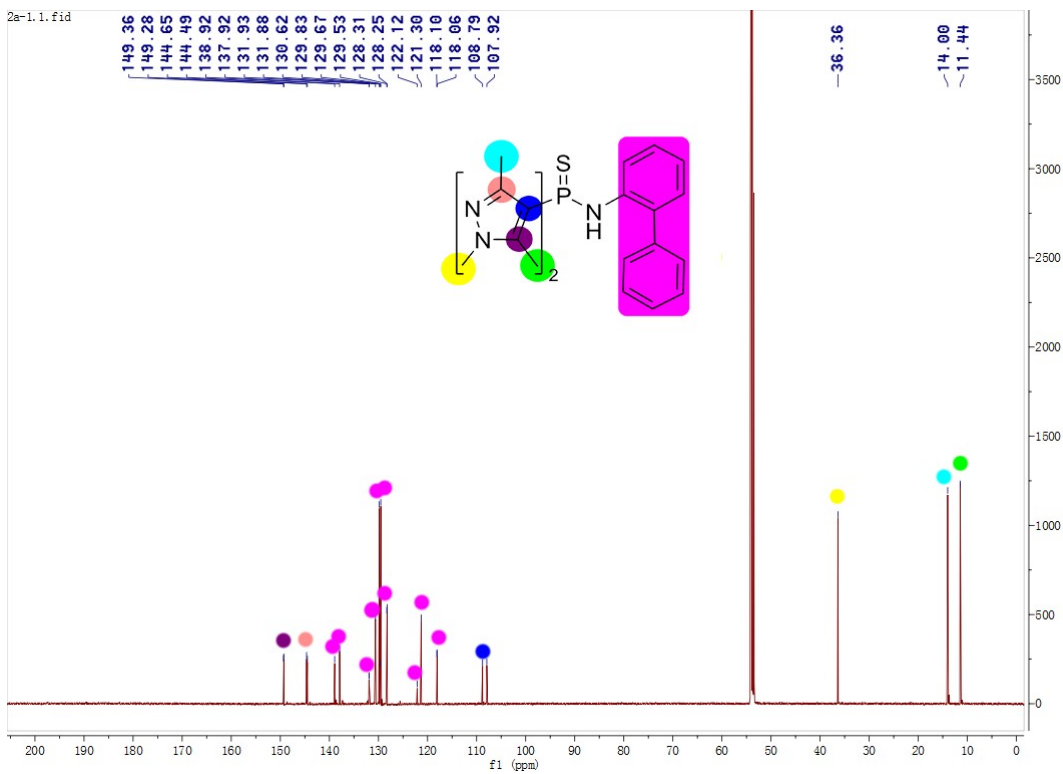

Fig. 27  $^{13}\text{C}$  NMR spectrum of **2a** (150 MHz,  $\text{CD}_2\text{Cl}_2$ , 298 K).

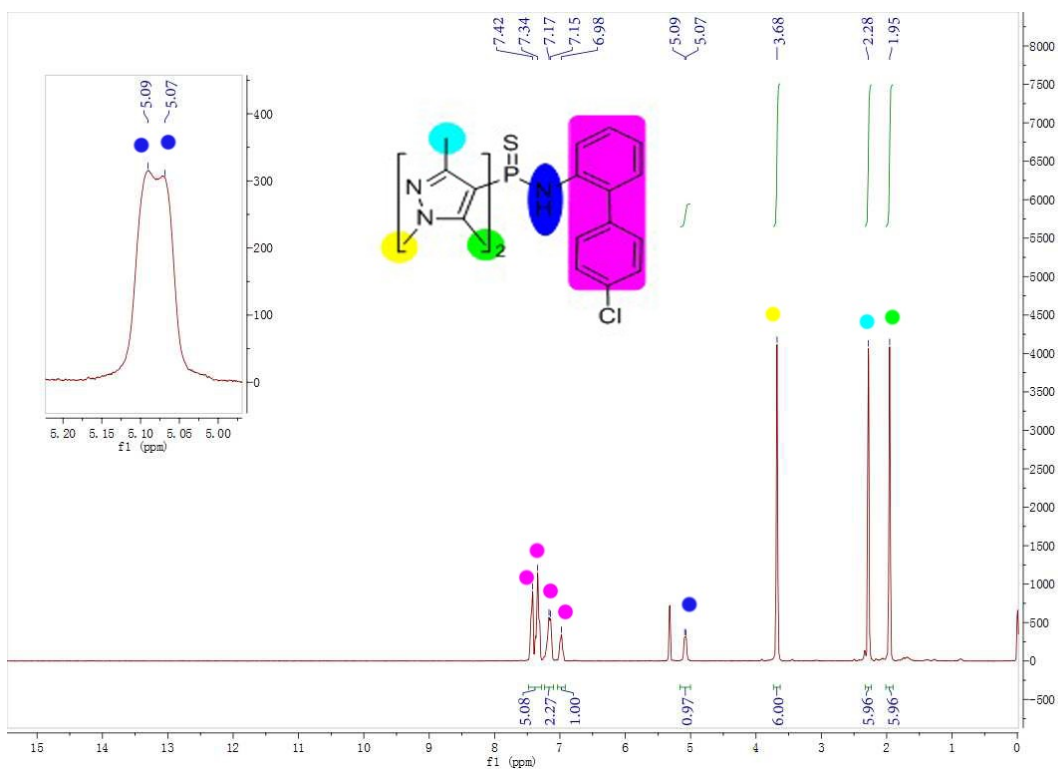

Fig. 28  $^1\text{H}$  NMR spectrum of **2b** (300 MHz,  $\text{CD}_2\text{Cl}_2$ , 298 K).

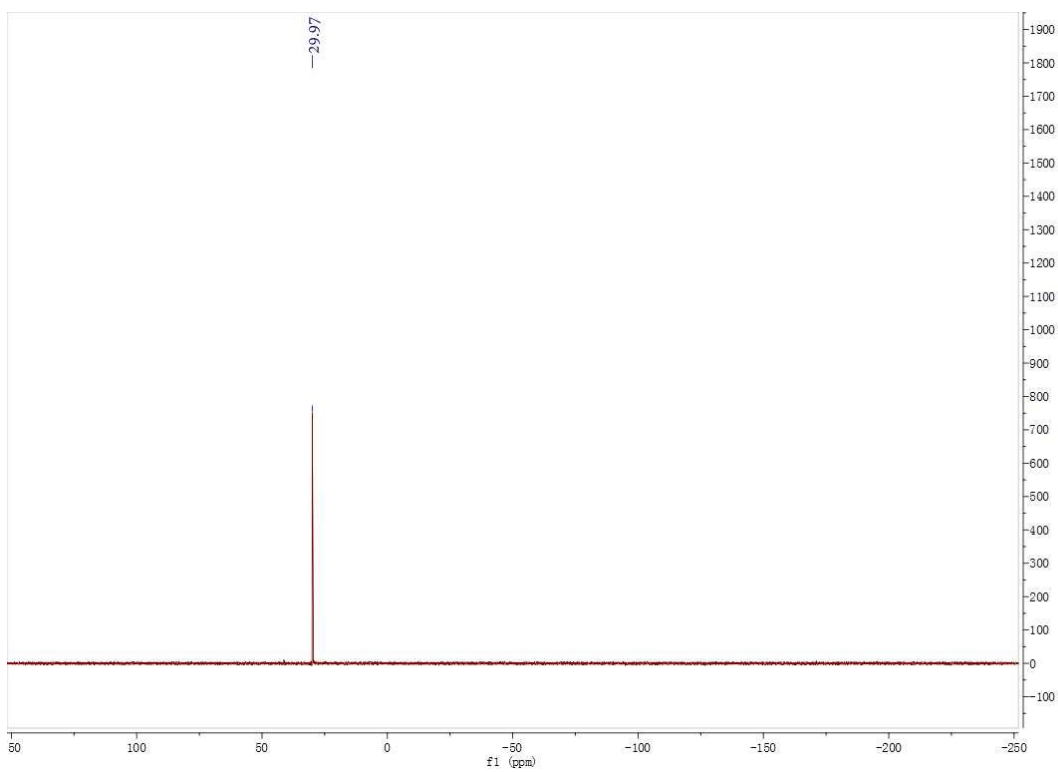

Fig. 29  $^{31}\text{P}$  NMR spectrum of **2b** (121.5 MHz,  $\text{CD}_2\text{Cl}_2$ , 298 K).

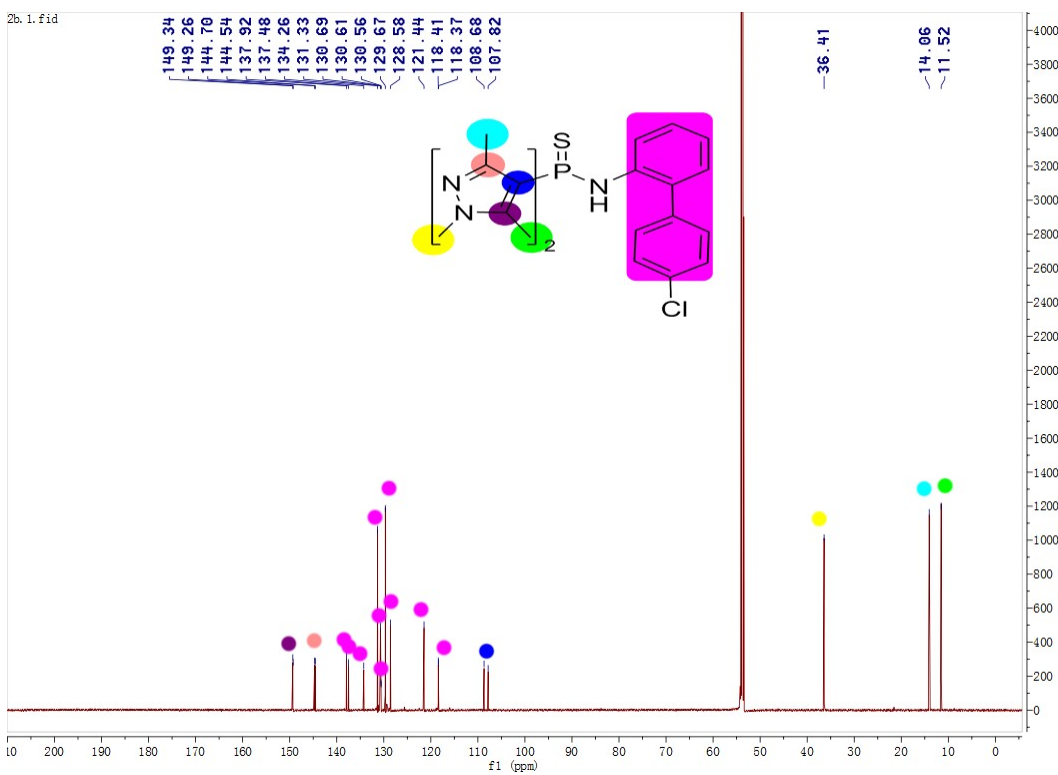

Fig. 30  $^{13}\text{C}$  NMR spectrum of **2b** (150 MHz,  $\text{CD}_2\text{Cl}_2$ , 298 K).



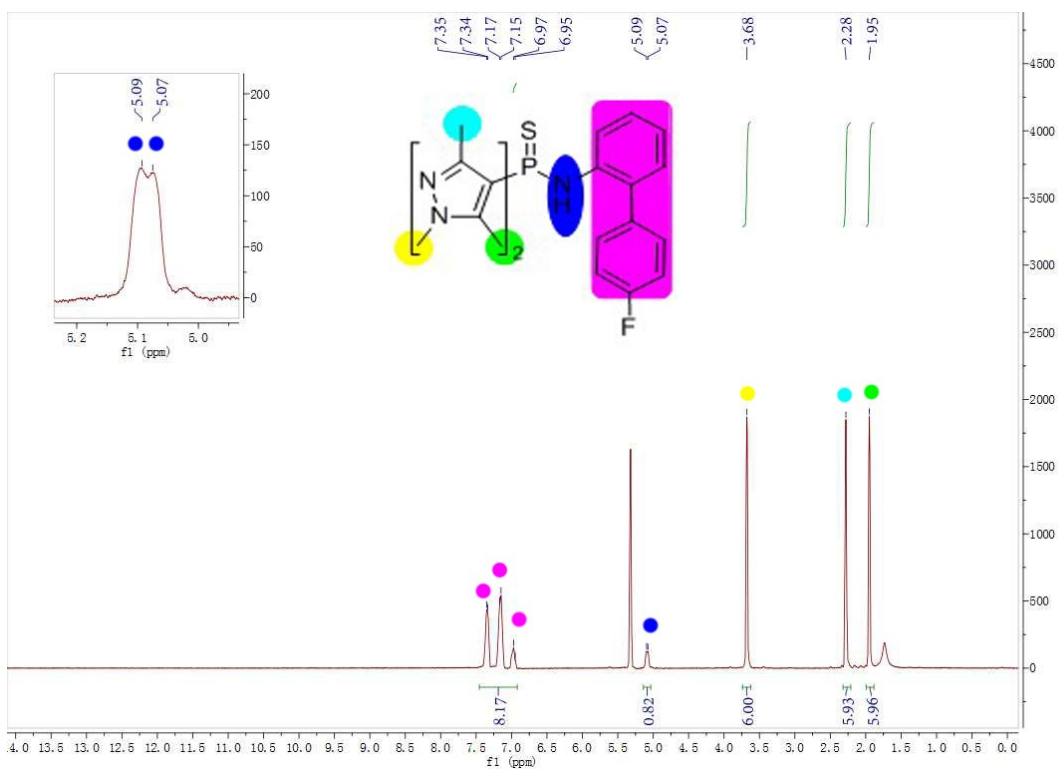

Fig. 31  $^1\text{H}$  NMR spectrum of **2c** (300 MHz,  $\text{CD}_2\text{Cl}_2$ , 298 K).

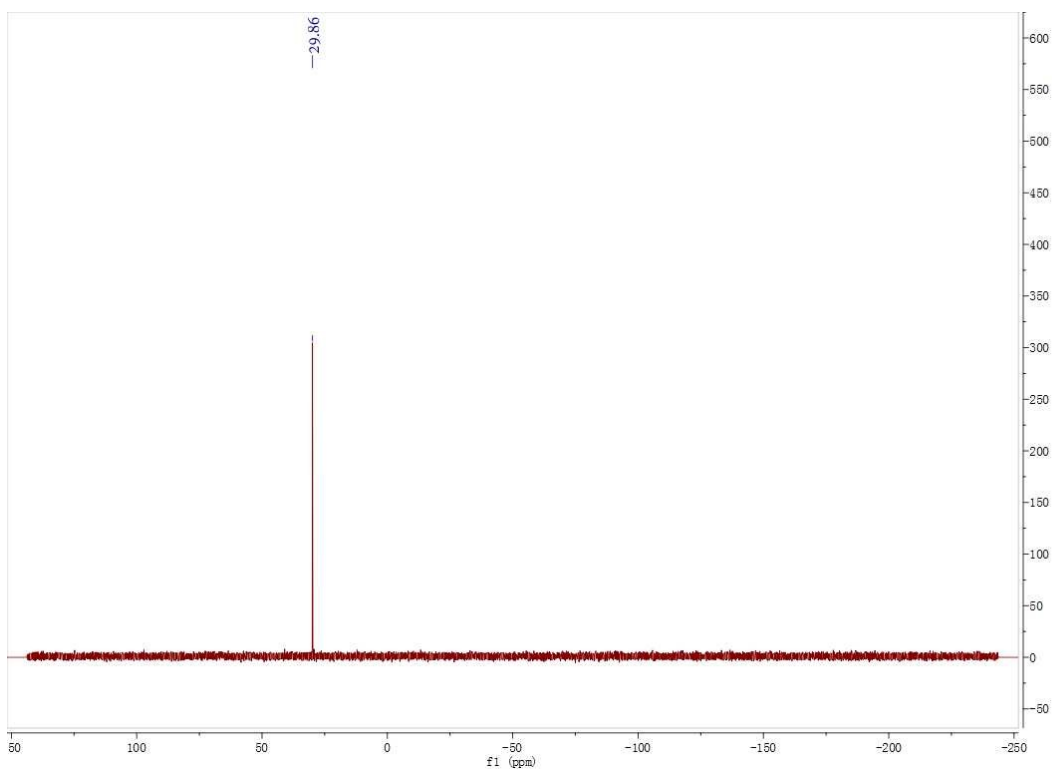

Fig. 32  $^{31}\text{P}$  NMR spectrum of **2c** (121.5 MHz,  $\text{CD}_2\text{Cl}_2$ , 298 K).

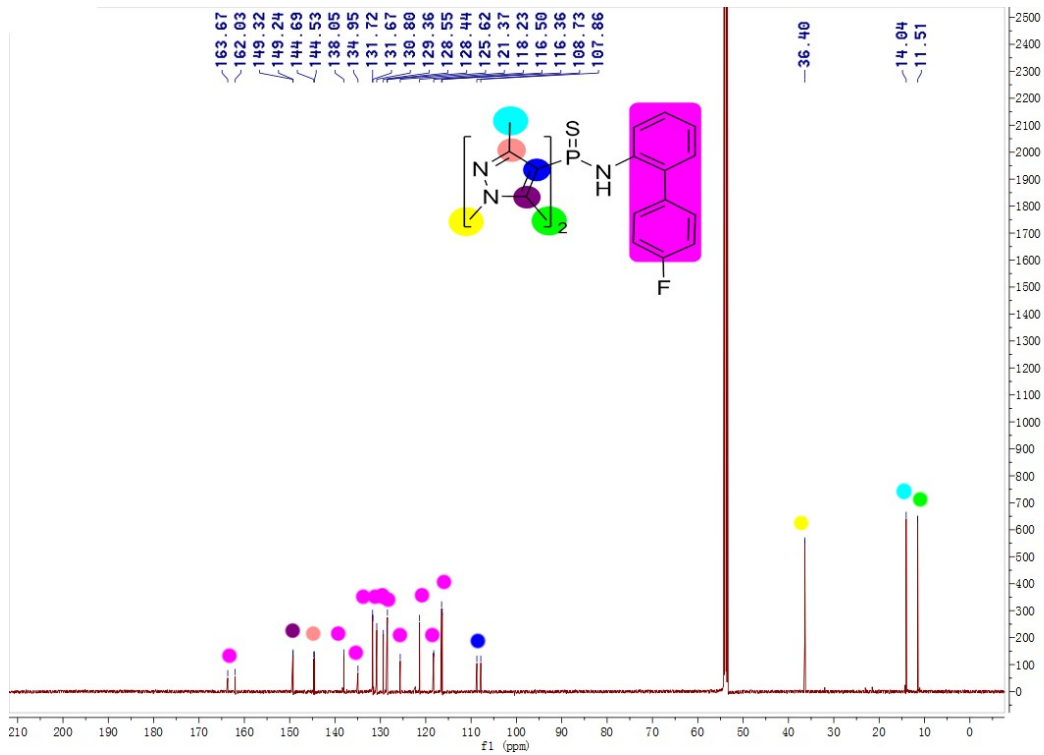

Fig. 33  $^{13}\text{C}$  NMR spectrum of **2c** (150 MHz,  $\text{CD}_2\text{Cl}_2$ , 298 K).

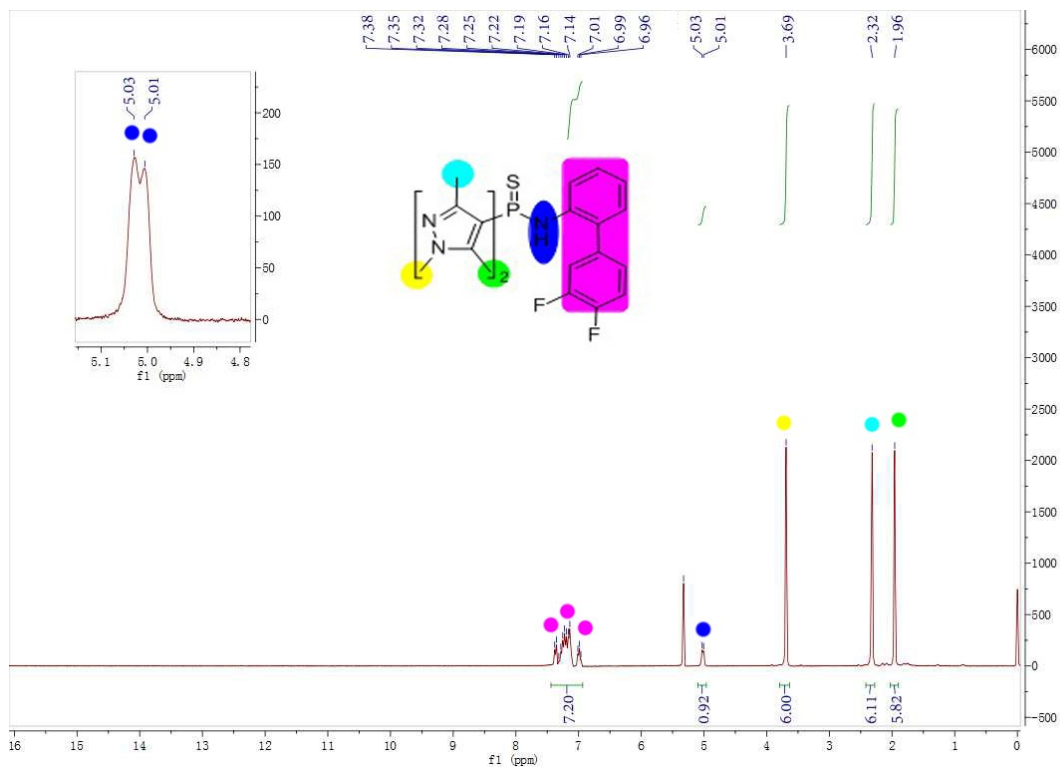

Fig. 34  $^1\text{H}$  NMR spectrum of **2d** (300 MHz,  $\text{CD}_2\text{Cl}_2$ , 298 K).

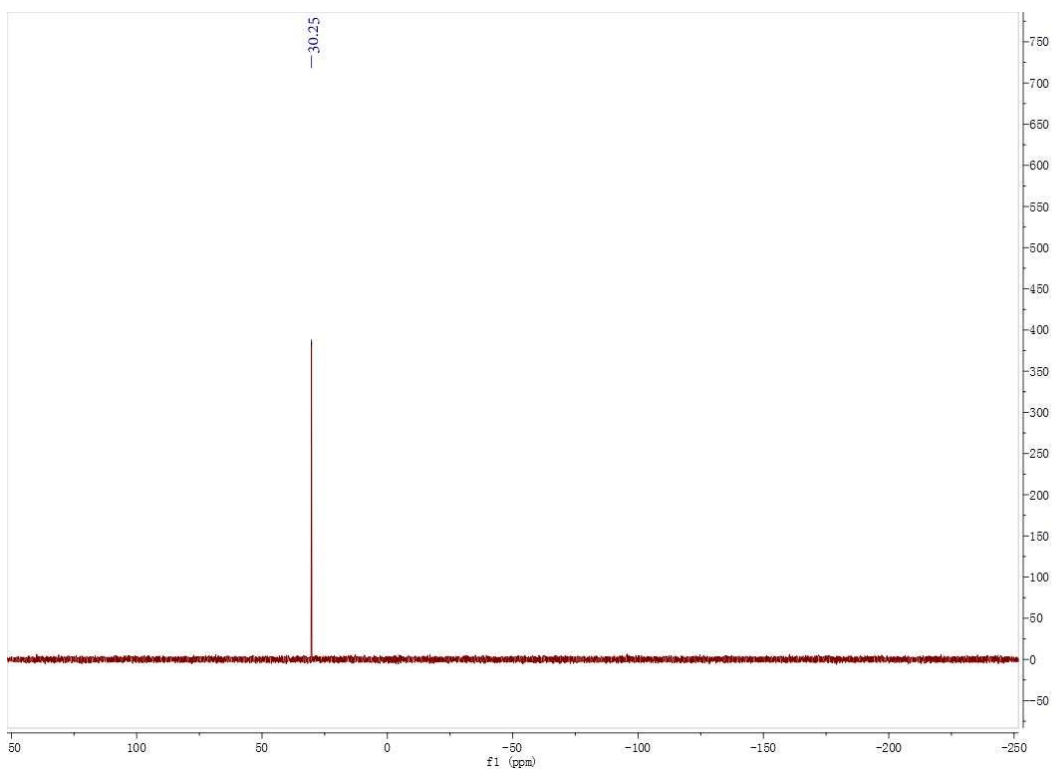

Fig. 35 <sup>31</sup>P NMR spectrum of **2d** (121.5 MHz, CD<sub>2</sub>Cl<sub>2</sub>, 298 K).

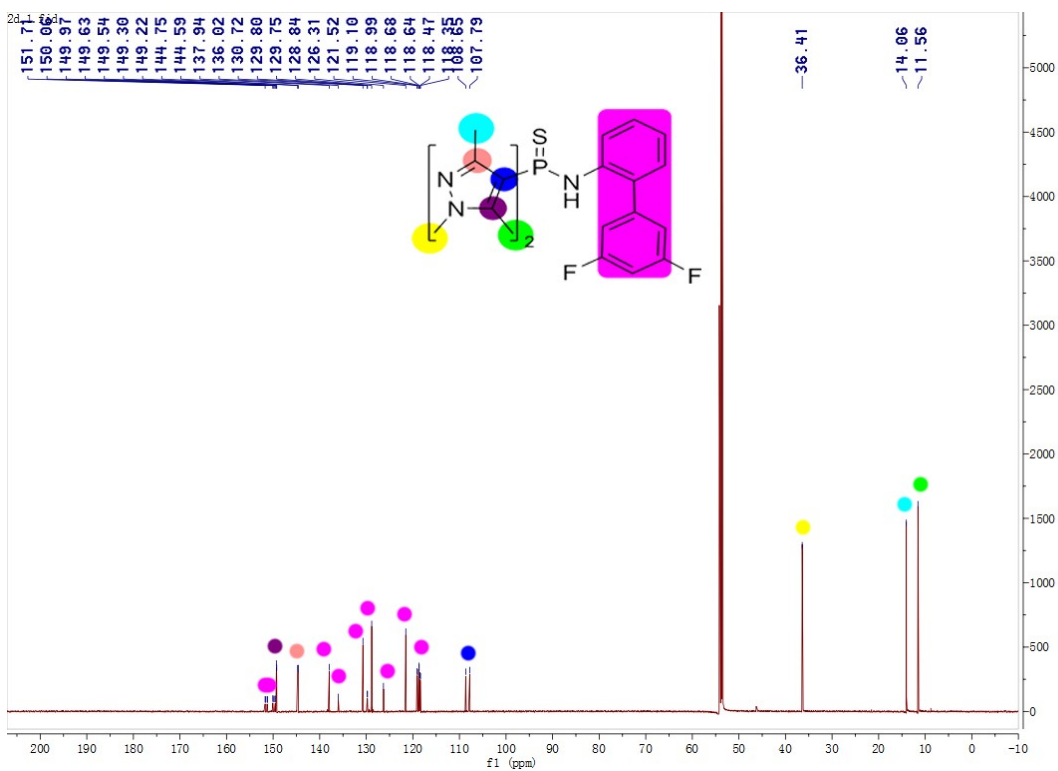

Fig. 36 <sup>13</sup>C NMR spectrum of **2d** (150 MHz, CD<sub>2</sub>Cl<sub>2</sub>, 298 K).

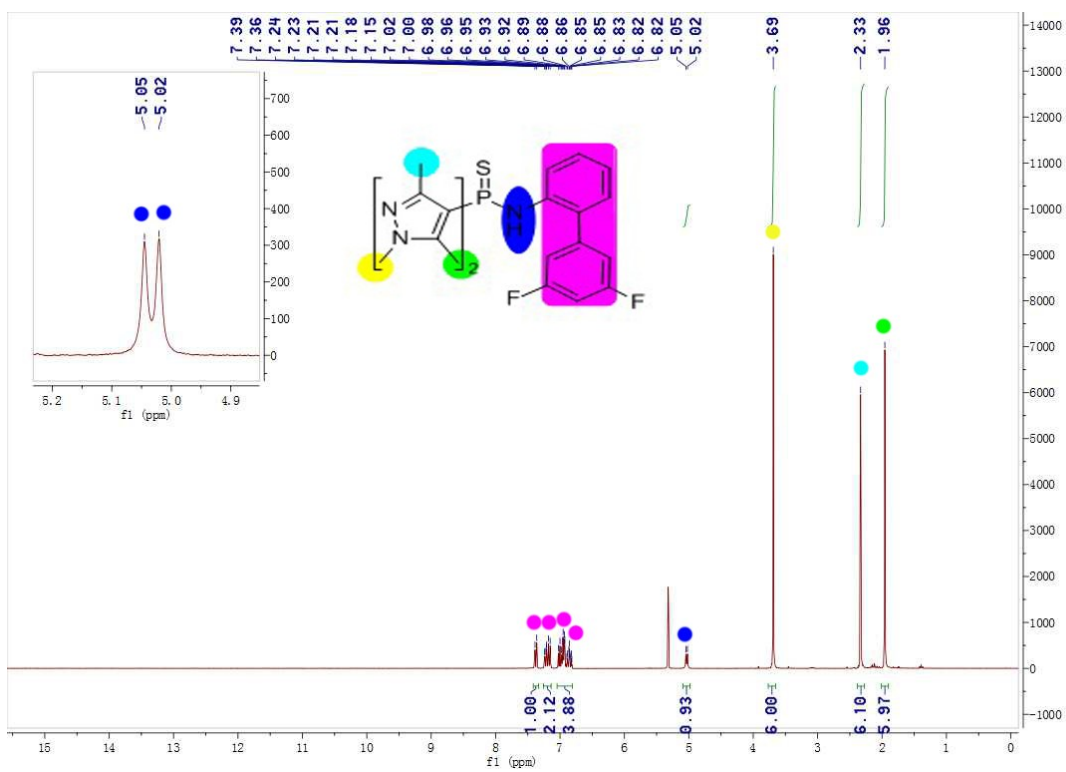

Fig. 37  $^1\text{H}$  NMR spectrum of **2e** (300 MHz,  $\text{CD}_2\text{Cl}_2$ , 298 K).

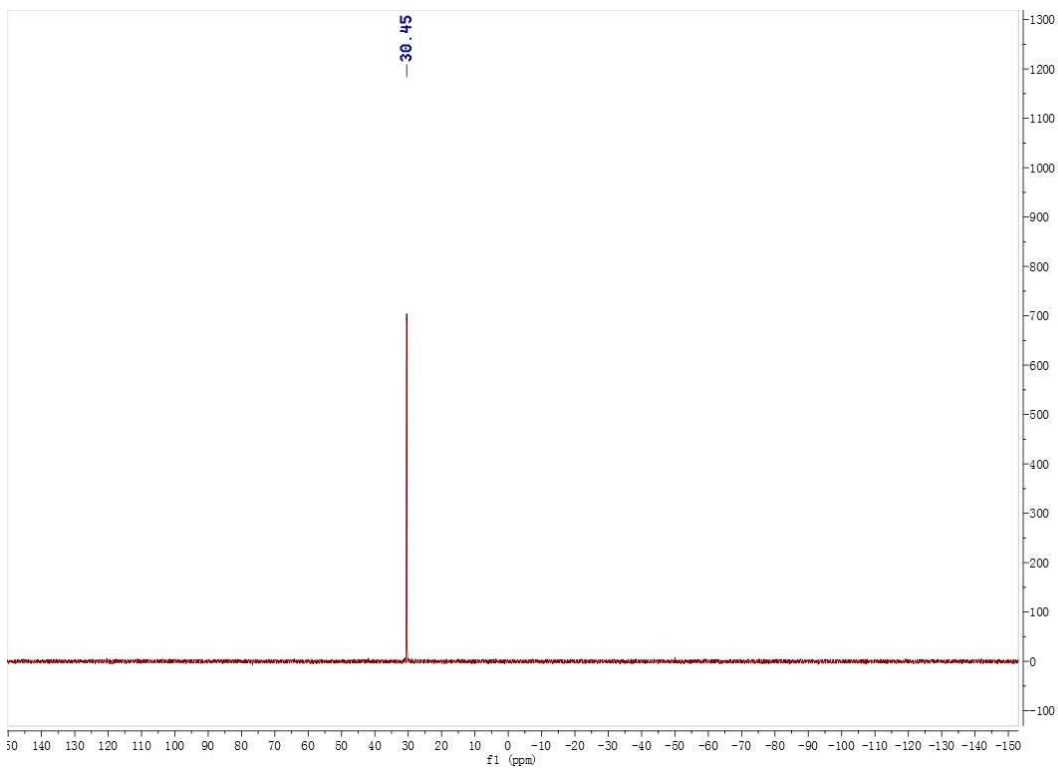

Fig. 38  $^{31}\text{P}$  NMR spectrum of **2e** (121.5 MHz,  $\text{CD}_2\text{Cl}_2$ , 298 K).

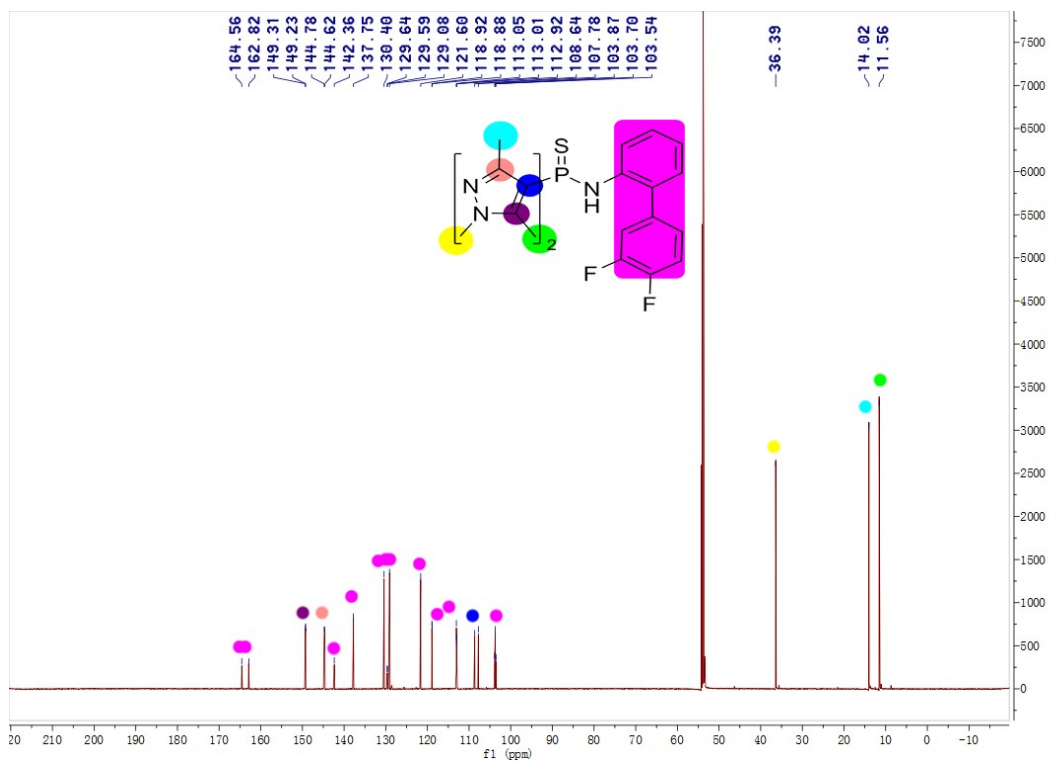

Fig. 39  $^{13}\text{C}$  NMR spectrum of **2e** (150 MHz,  $\text{CD}_2\text{Cl}_2$ , 298 K).

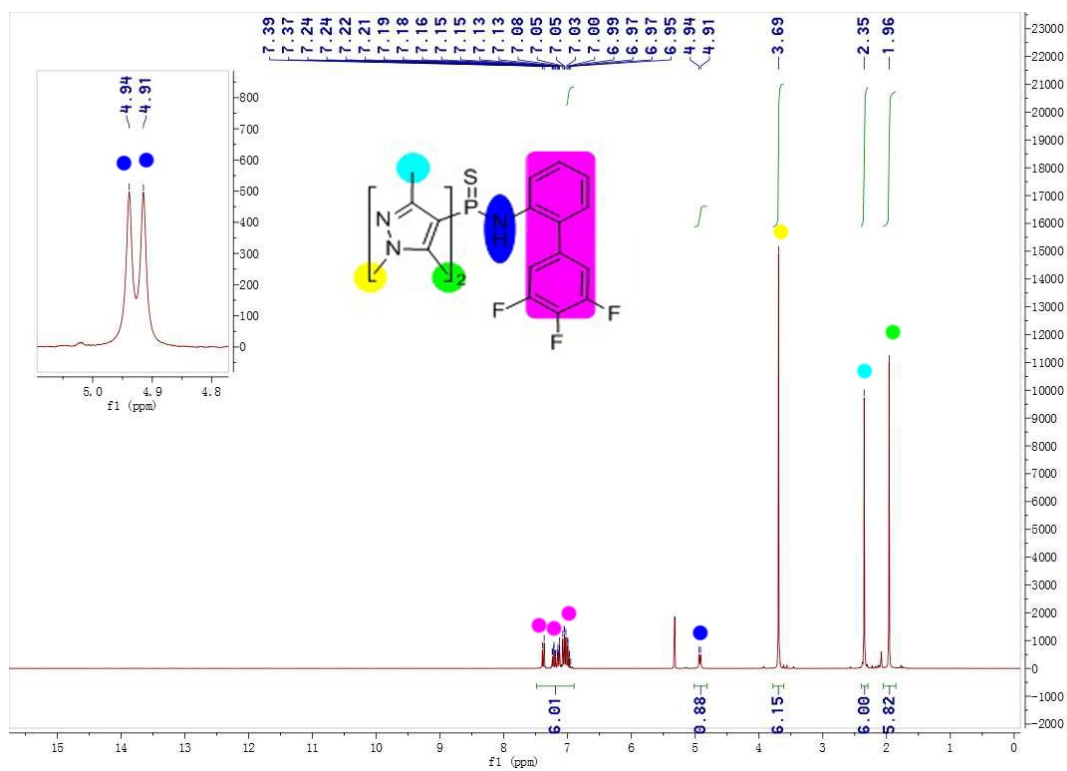

Fig. 40  $^1\text{H}$  NMR spectrum of **2f** (300 MHz,  $\text{CD}_2\text{Cl}_2$ , 298 K).

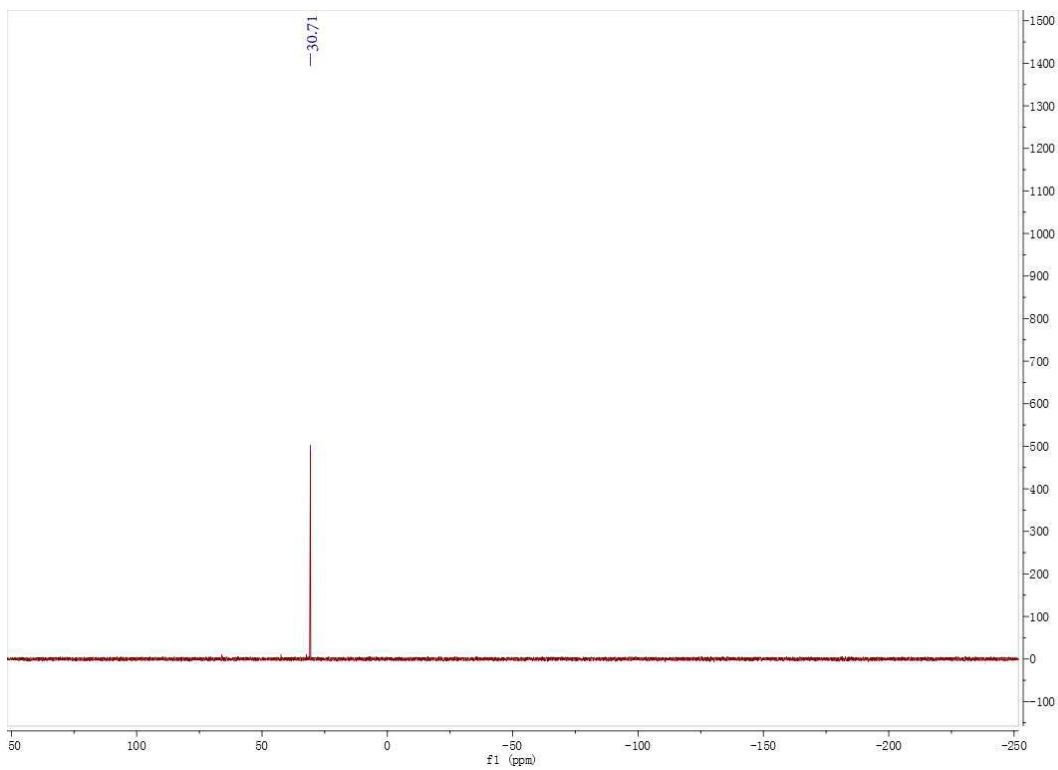

Fig. 41 <sup>31</sup>P NMR spectrum of **2f** (121.5 MHz, CD<sub>2</sub>Cl<sub>2</sub>, 298 K).

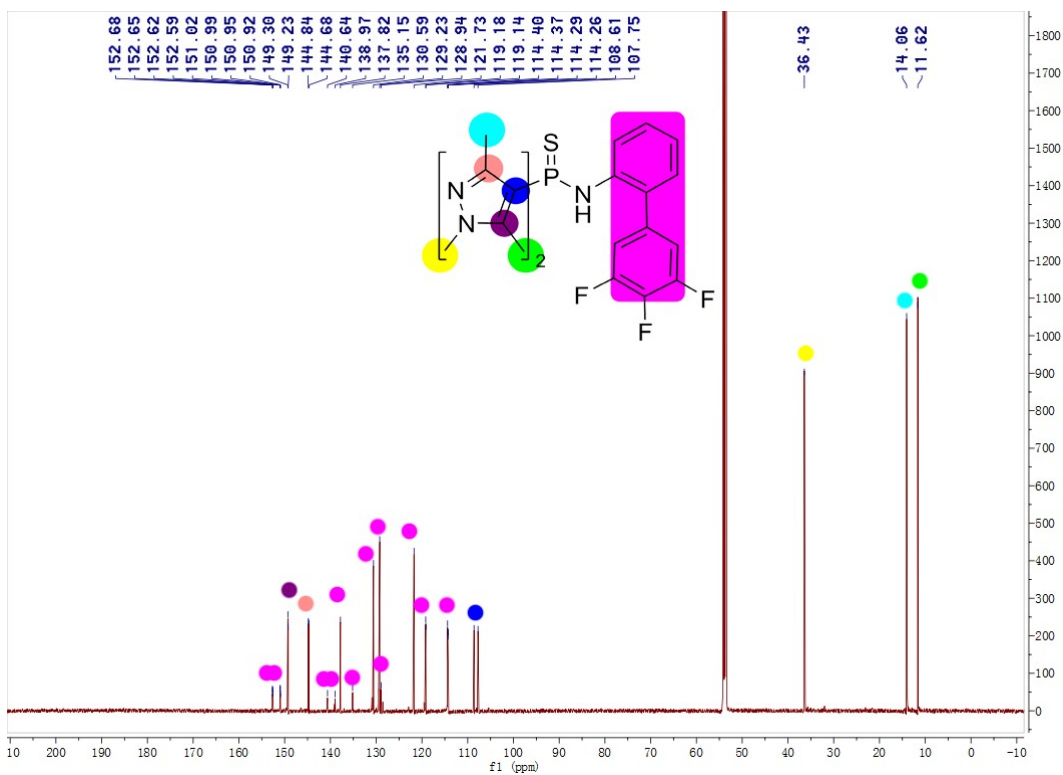

Fig. 42 <sup>13</sup>C NMR spectrum of **2f** (150 MHz, CD<sub>2</sub>Cl<sub>2</sub>, 298 K).

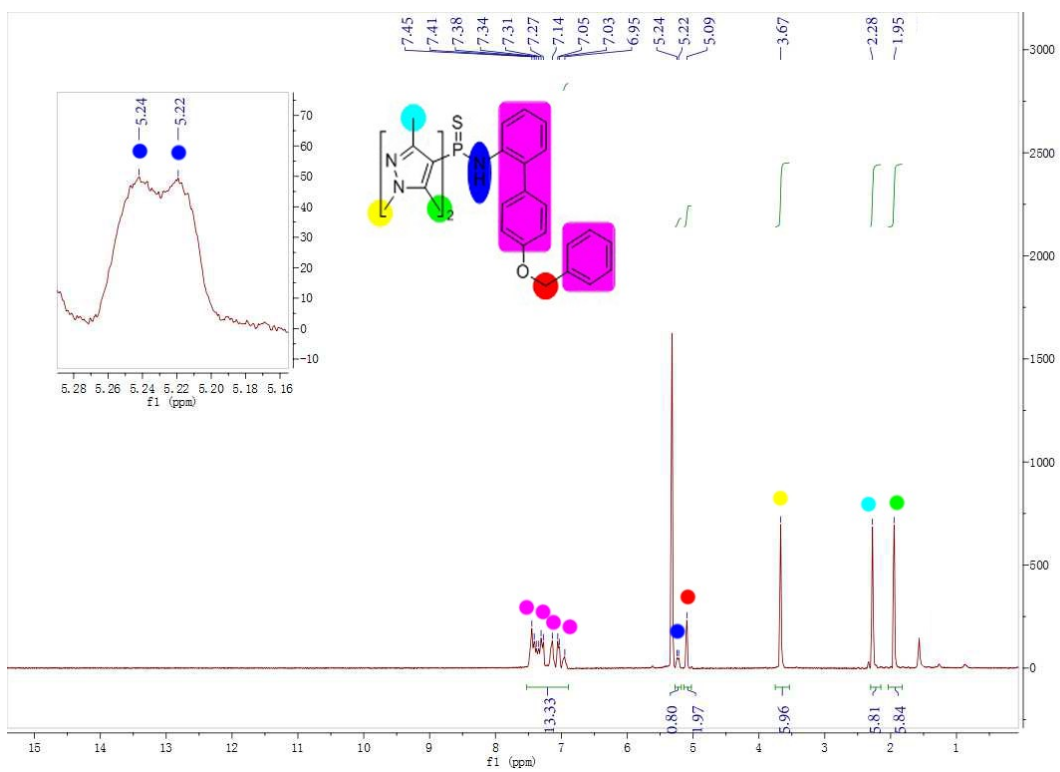

Fig. 43  $^1\text{H}$  NMR spectrum of **2g** (300 MHz,  $\text{CD}_2\text{Cl}_2$ , 298 K).

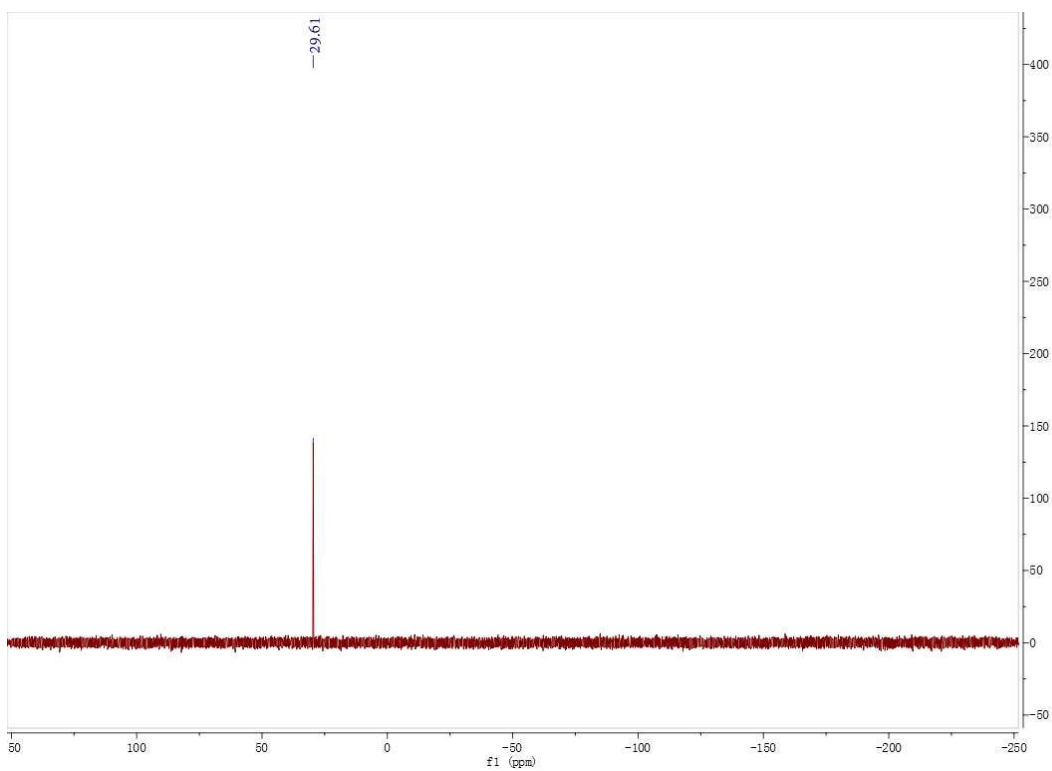

Fig. 44  $^{31}\text{P}$  NMR spectrum of **2g** (121.5 MHz,  $\text{CD}_2\text{Cl}_2$ , 298 K).

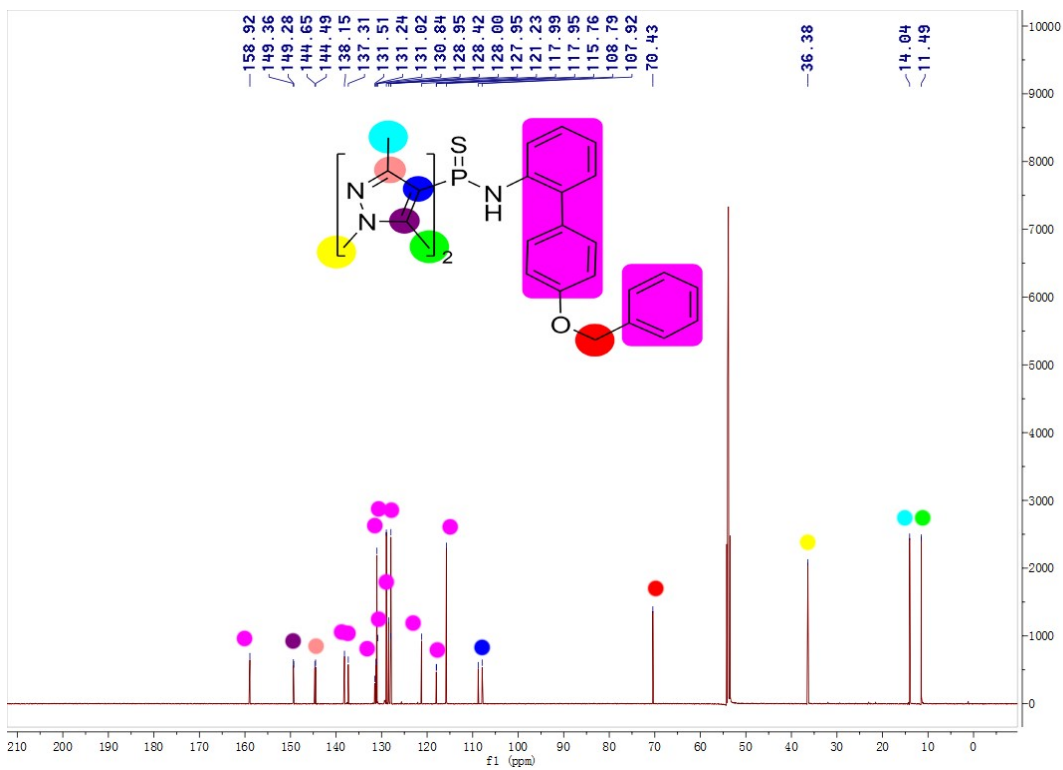

Fig. 45  $^{13}\text{C}$  NMR spectrum of **2g** (150 MHz,  $\text{CD}_2\text{Cl}_2$ , 298 K).

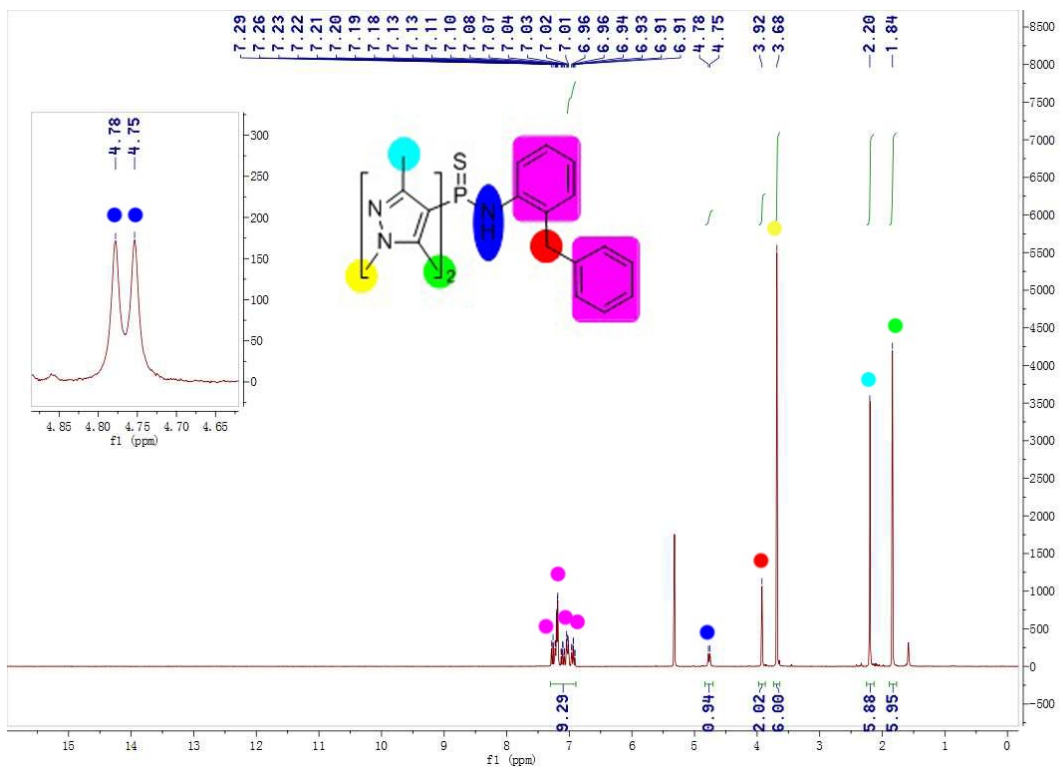

Fig. 46  $^1\text{H}$  NMR spectrum of **2h** (300 MHz,  $\text{CD}_2\text{Cl}_2$ , 298 K).



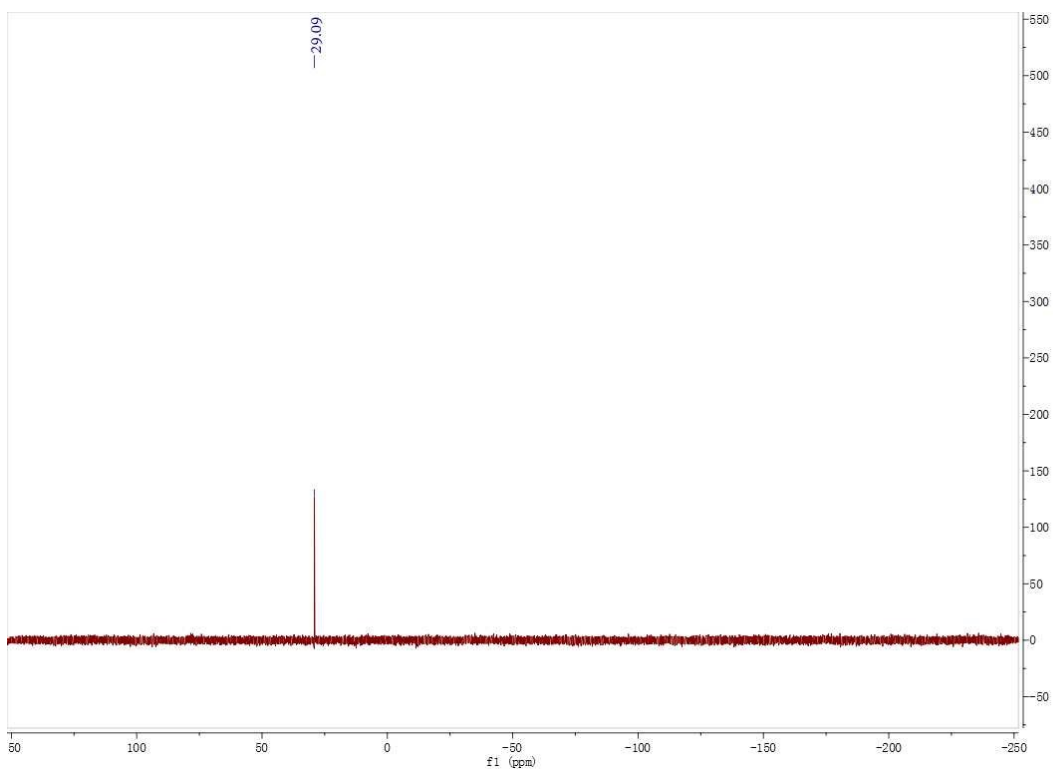

Fig. 47 <sup>31</sup>P NMR spectrum of **2h** (121.5 MHz, CD<sub>2</sub>Cl<sub>2</sub>, 298 K).

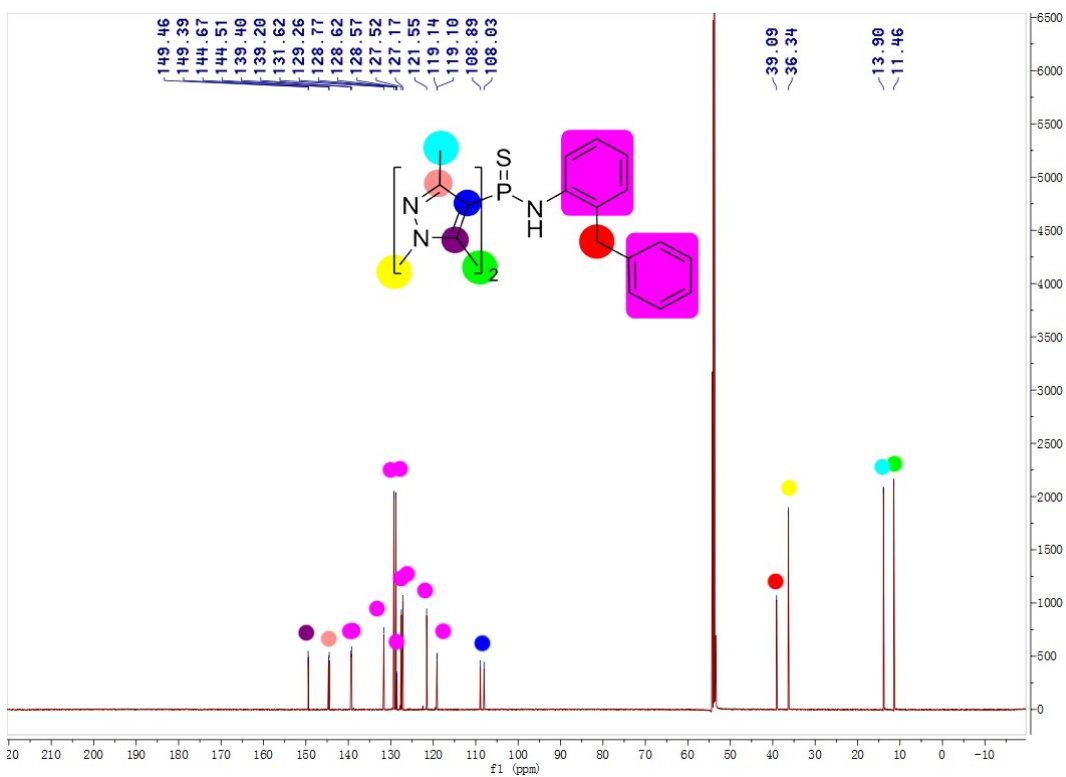

Fig. 48 <sup>13</sup>C NMR spectrum of **2h** (150 MHz, CD<sub>2</sub>Cl<sub>2</sub>, 298 K).

## 2. IR spectra of 1a-2h.

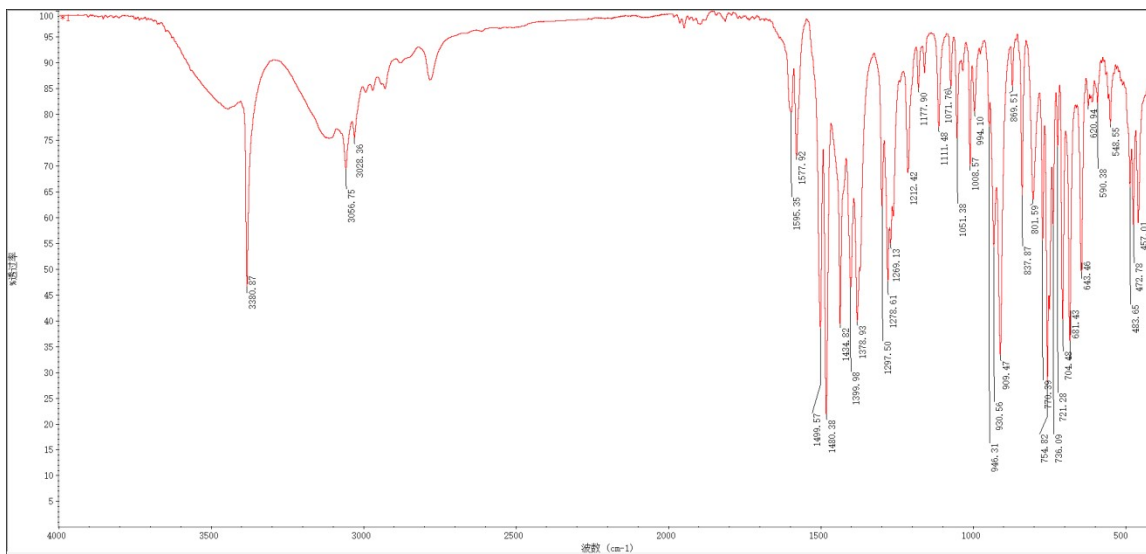

Fig. 49 IR spectrum of 1a.

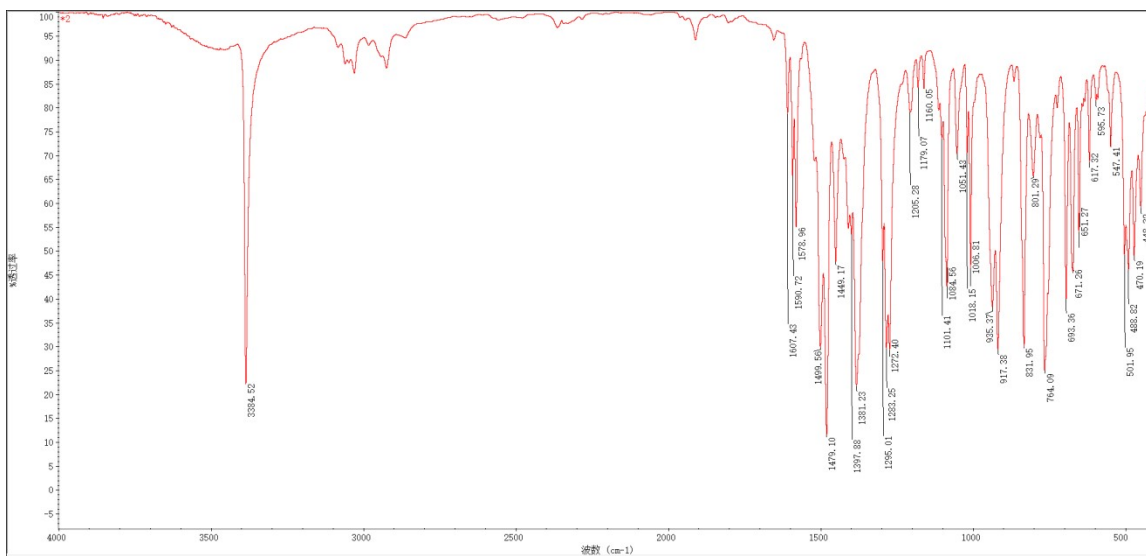

Fig. 50 IR spectrum of 1b.

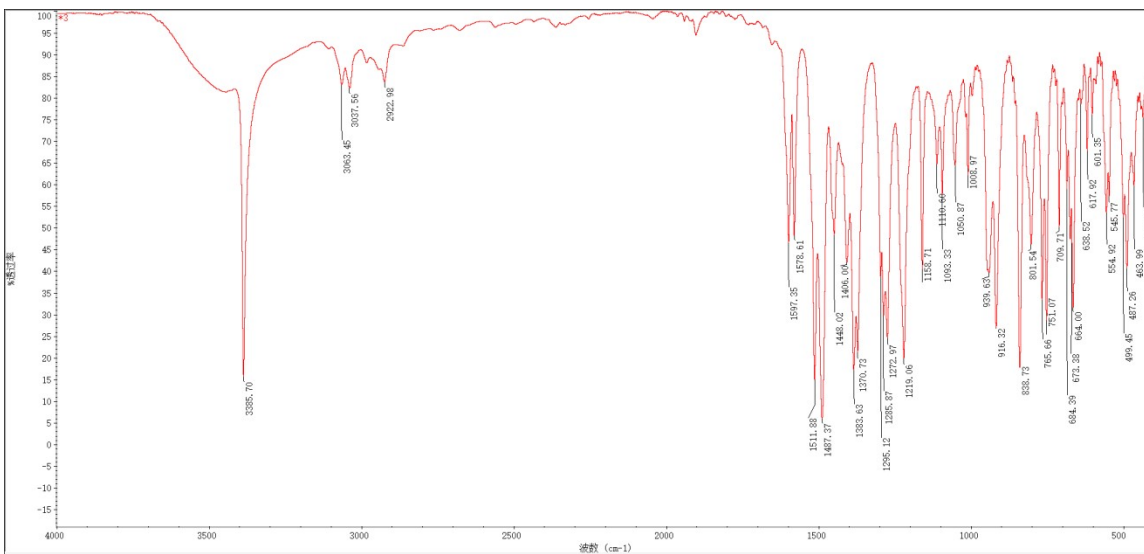

Fig. 51 IR spectrum of **1c**.

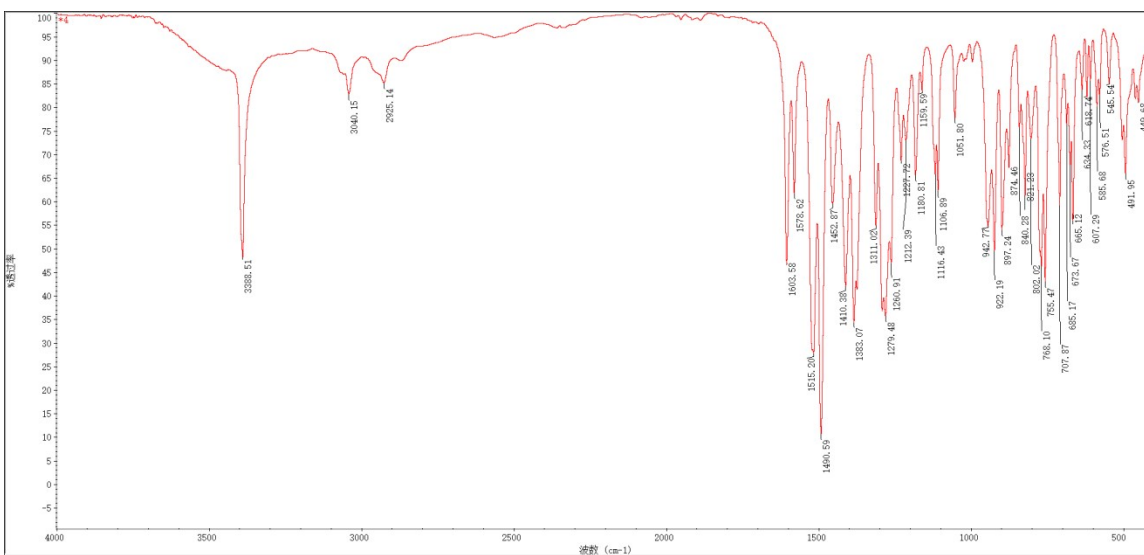

Fig. 52 IR spectrum of **1d**.

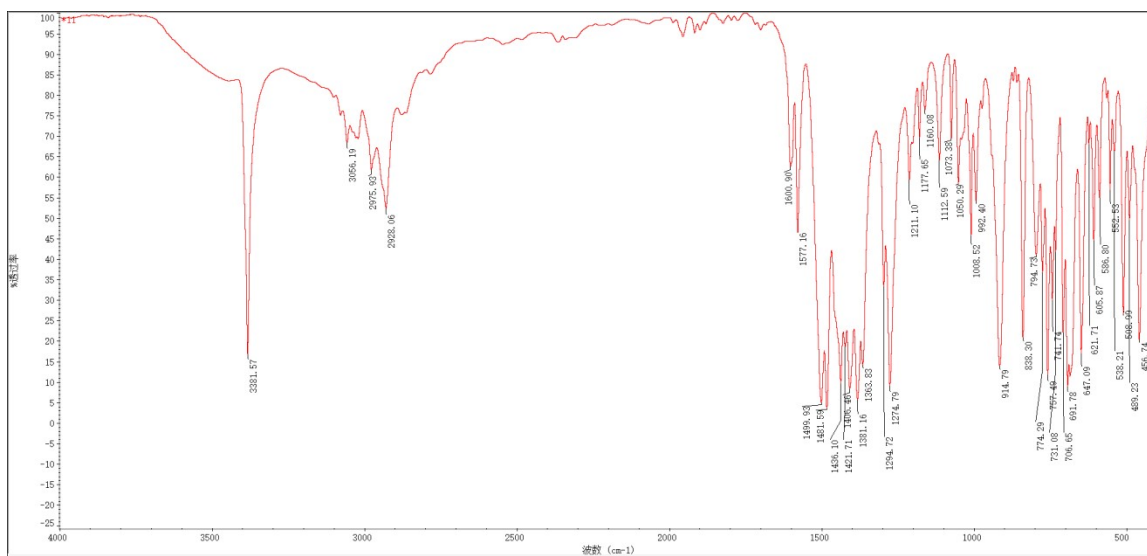

Fig. 53 IR spectrum of **1e**.

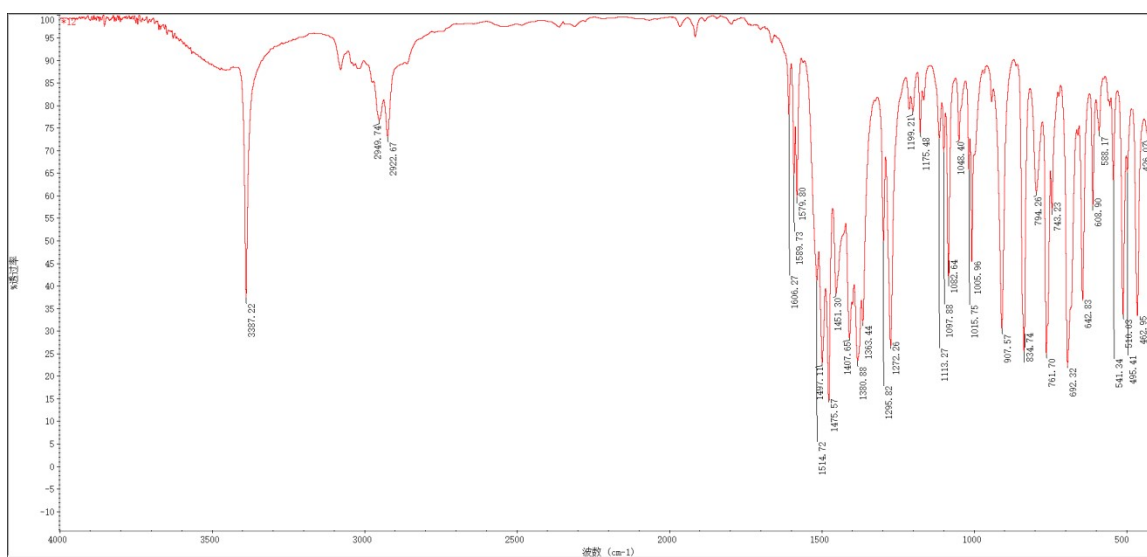

Fig. 54 IR spectrum of **1f**.

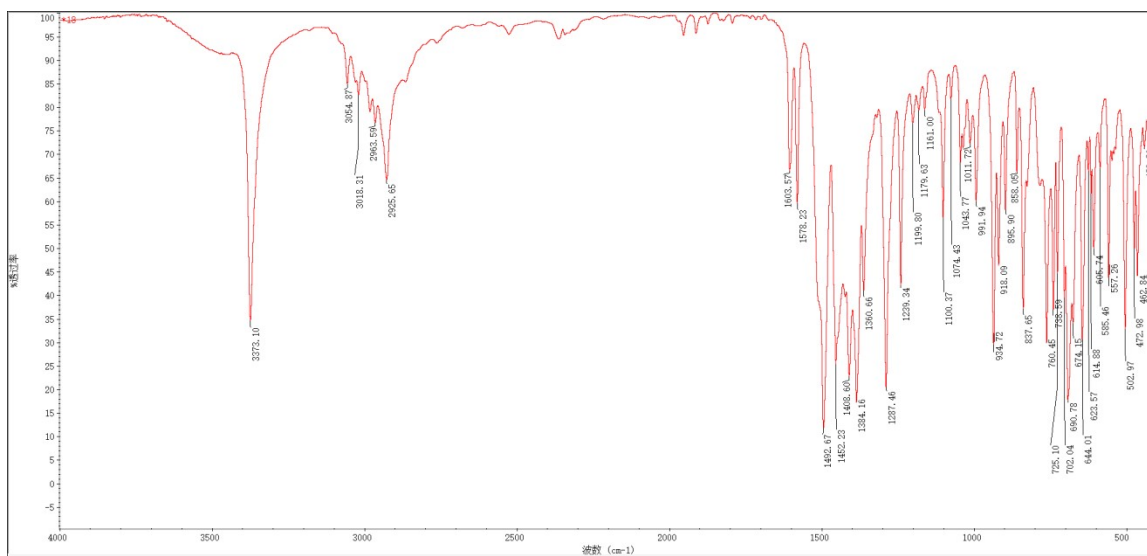

Fig. 55 IR spectrum of **1g**.

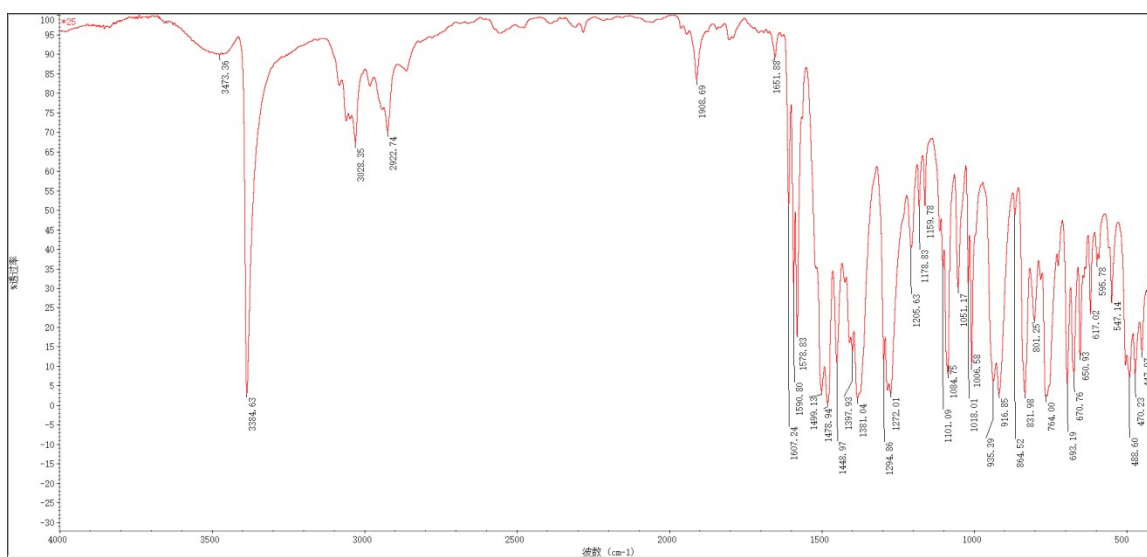

Fig. 56 IR spectrum of **1h**.

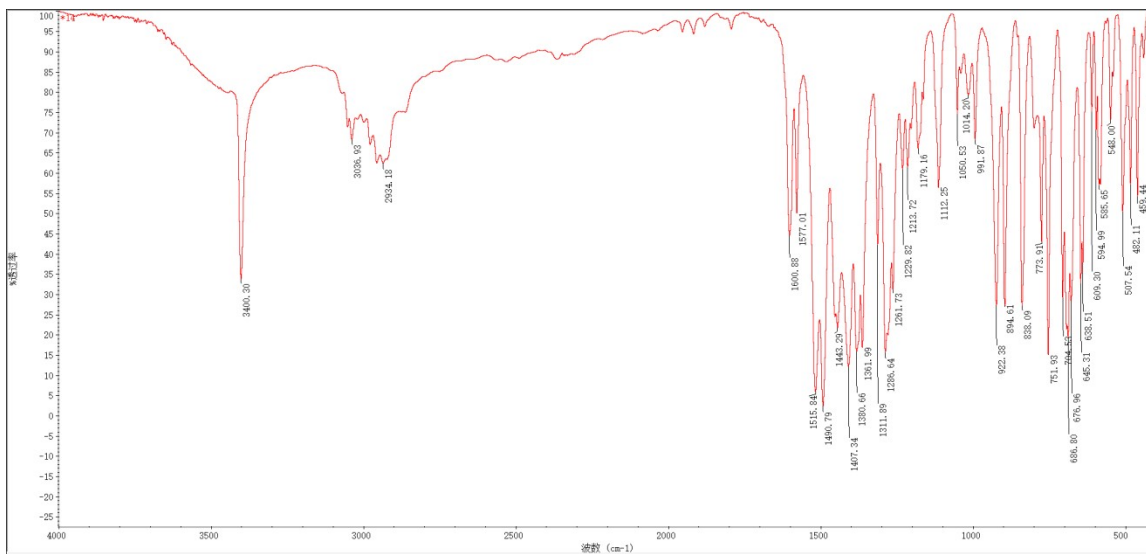

Fig. 57 IR spectrum of 2a.

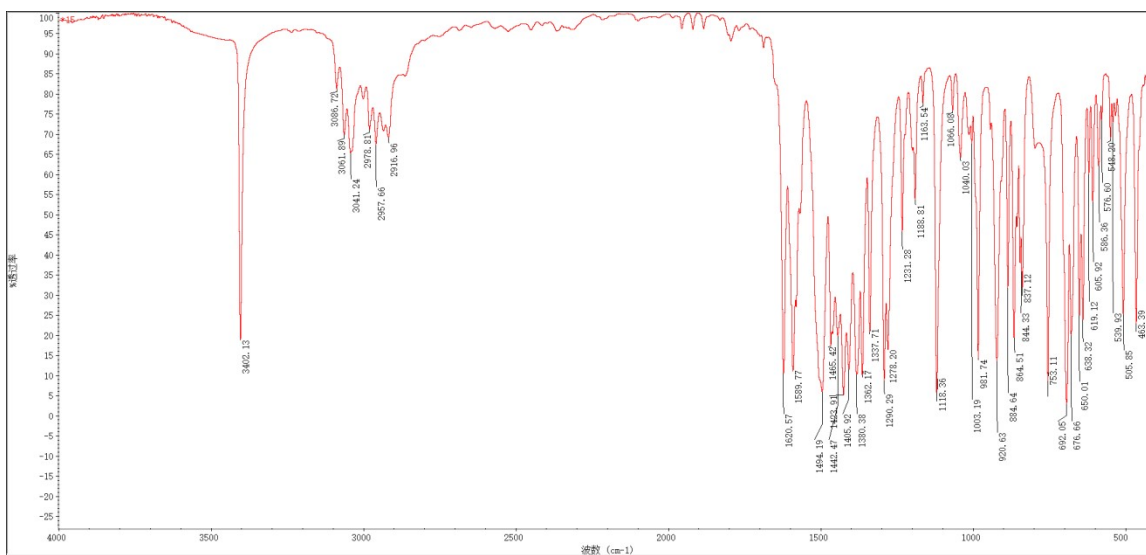

Fig. 58 IR spectrum of 2b.

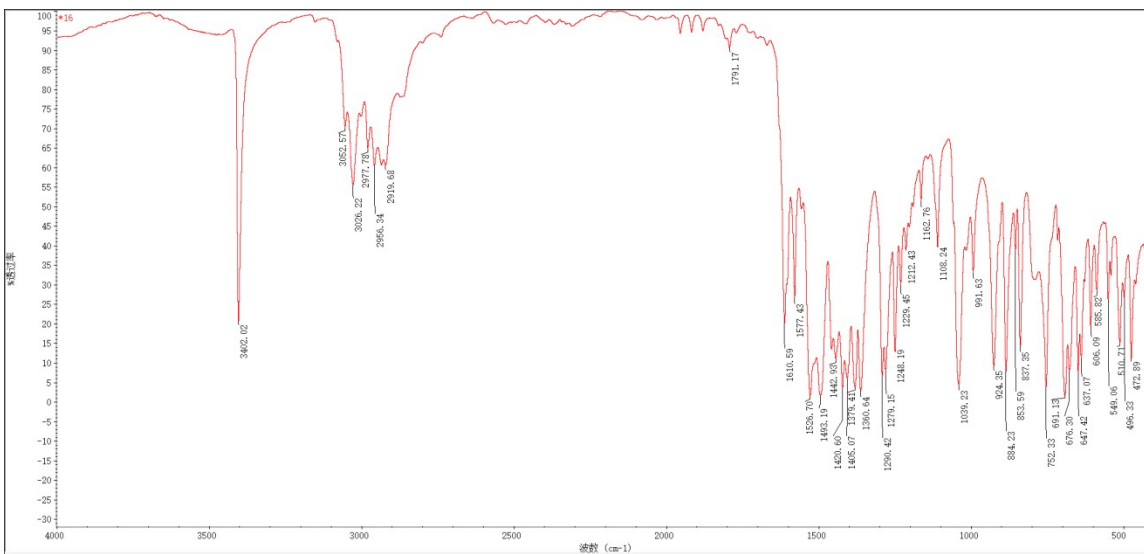

Fig. 59 IR spectrum of 2c.

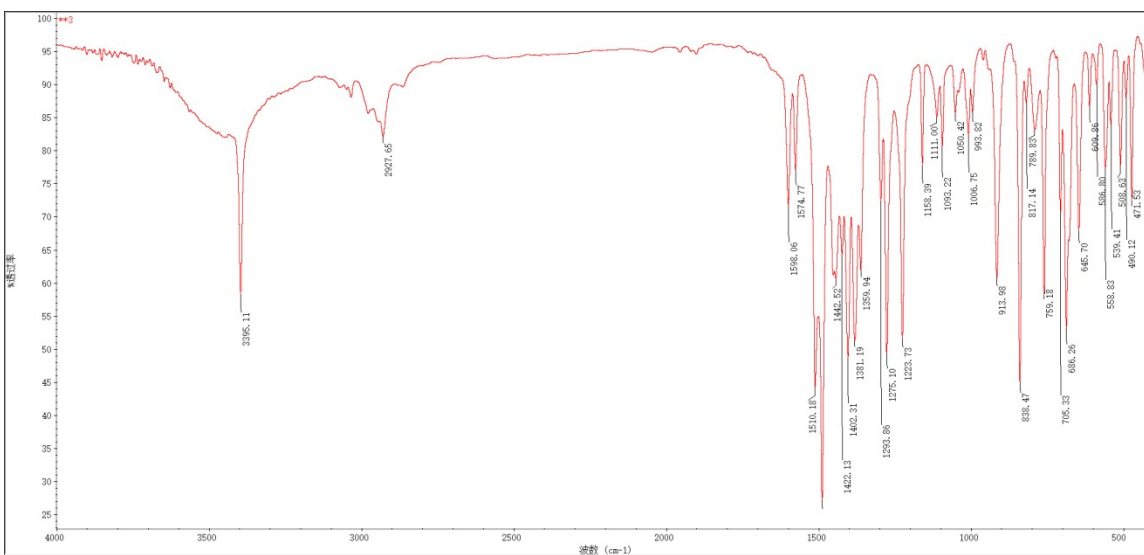

Fig. 60 IR spectrum of 2d.

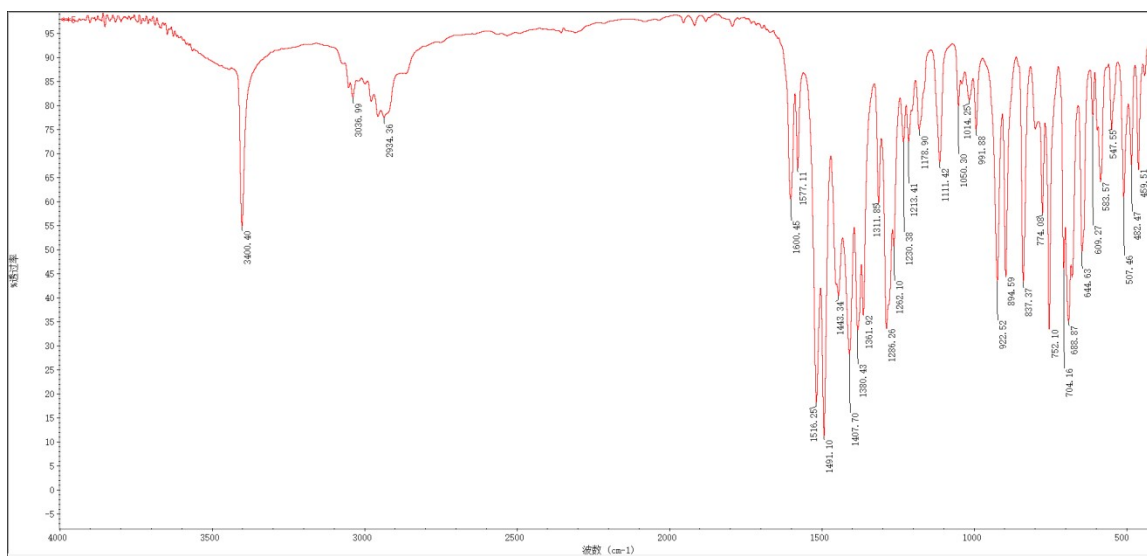

Fig. 61 IR spectrum of 2e.

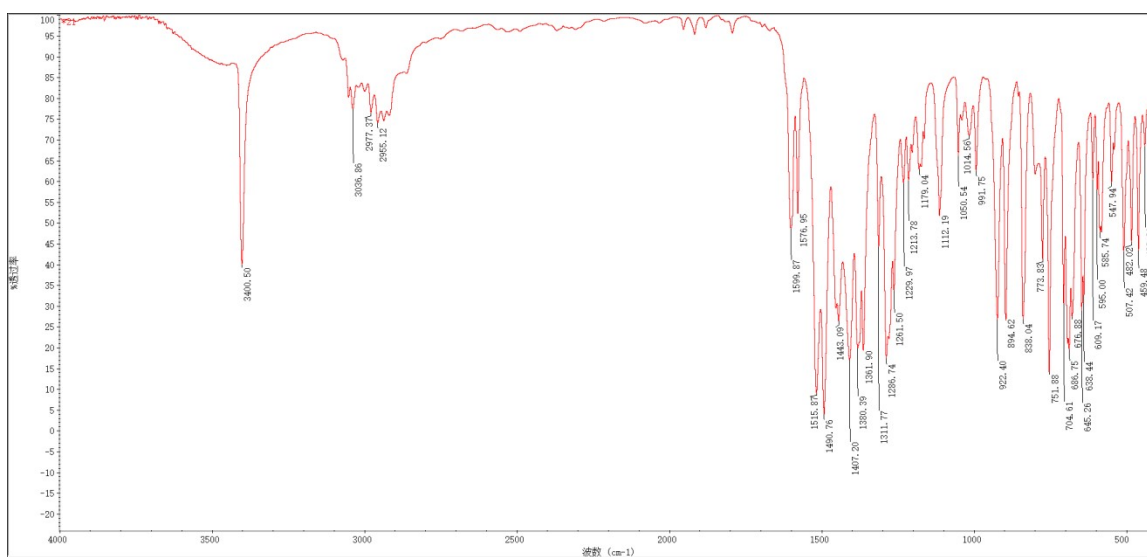

Fig. 62 IR spectrum of 2f.



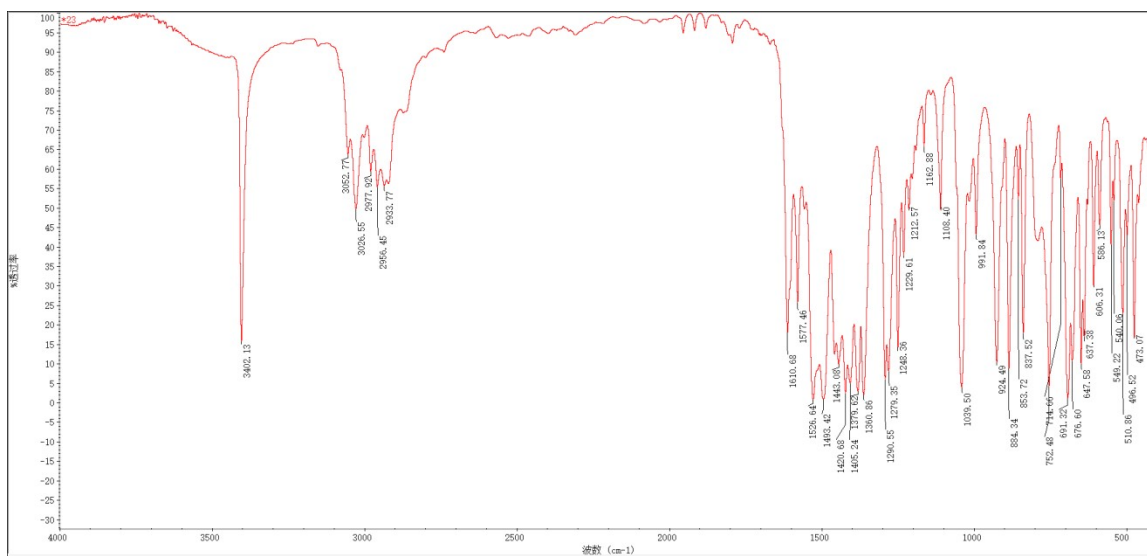

Fig. 63 IR spectrum of **2g**.

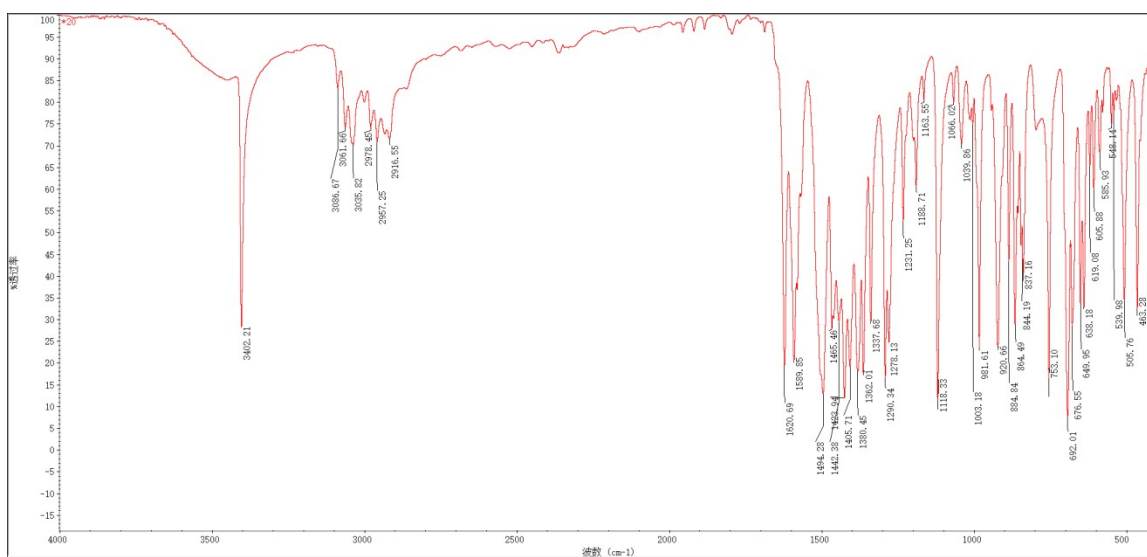

Fig. 64 IR spectrum of **2h**.

### 3. Mass spectra of **1a-2h**.

20210421-81-1 #13-18 RT: 0.20-0.29 AV: 6 SB: 8 0.04-0.15 NL: 1.64E8  
T: + c ESI Q1MS [100.000-1000.000]

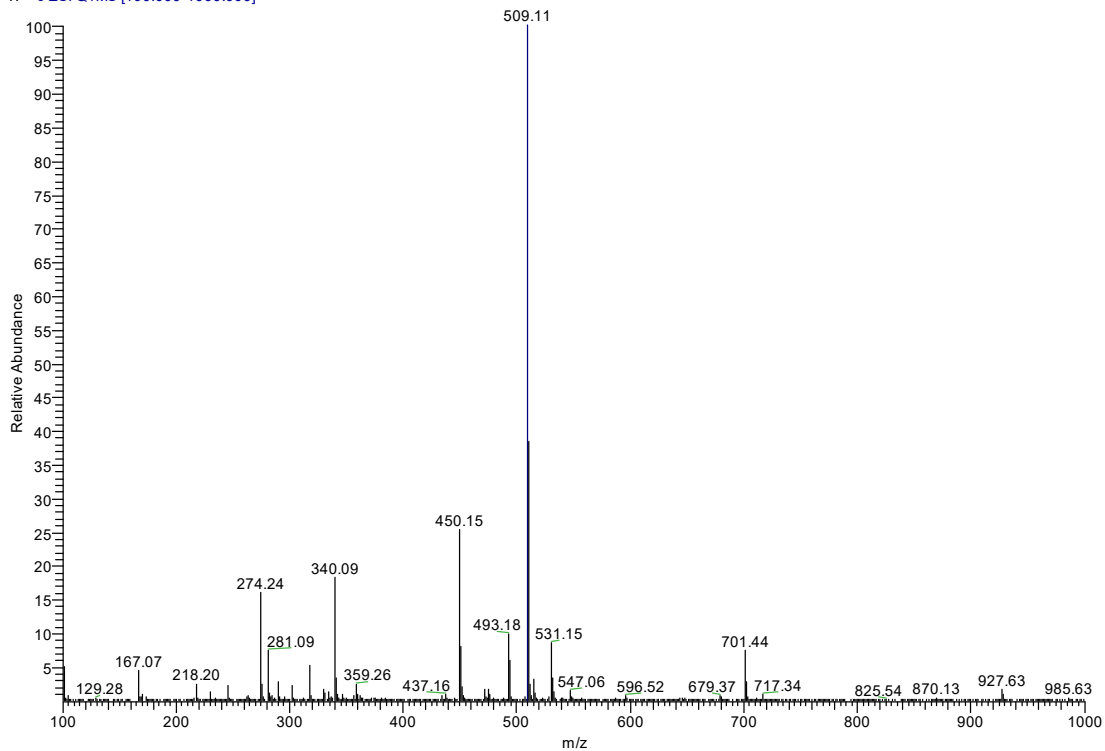

Fig. 65 MS spectrum of **1a**.

20210421-81-2 #16-19 RT: 0.25-0.30 AV: 4 SB: 8 0.04-0.15 NL: 3.19E7  
T: + c ESI Q1MS [100.000-1000.000]

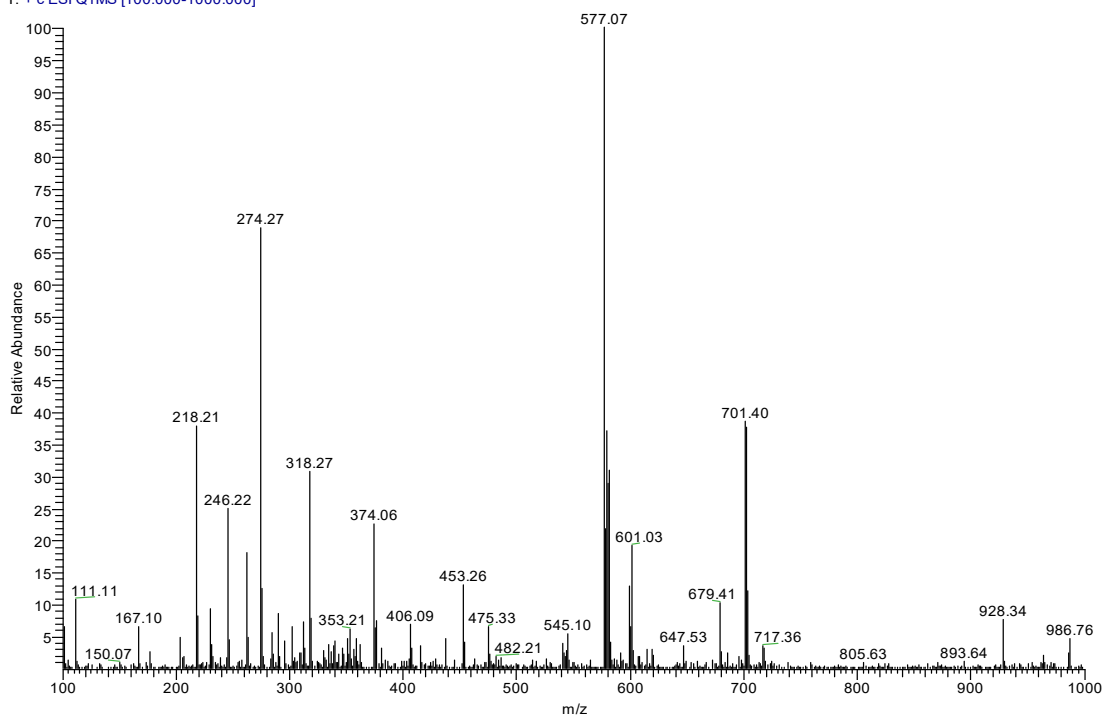

Fig. 66 MS spectrum of 1b.

20210421-81-3 #13-17 RT: 0.22-0.28 AV: 5 SB: 8 0.03-0.15 NL: 1.46E8  
T: + c ESI Q1MS [100.000-1000.000]

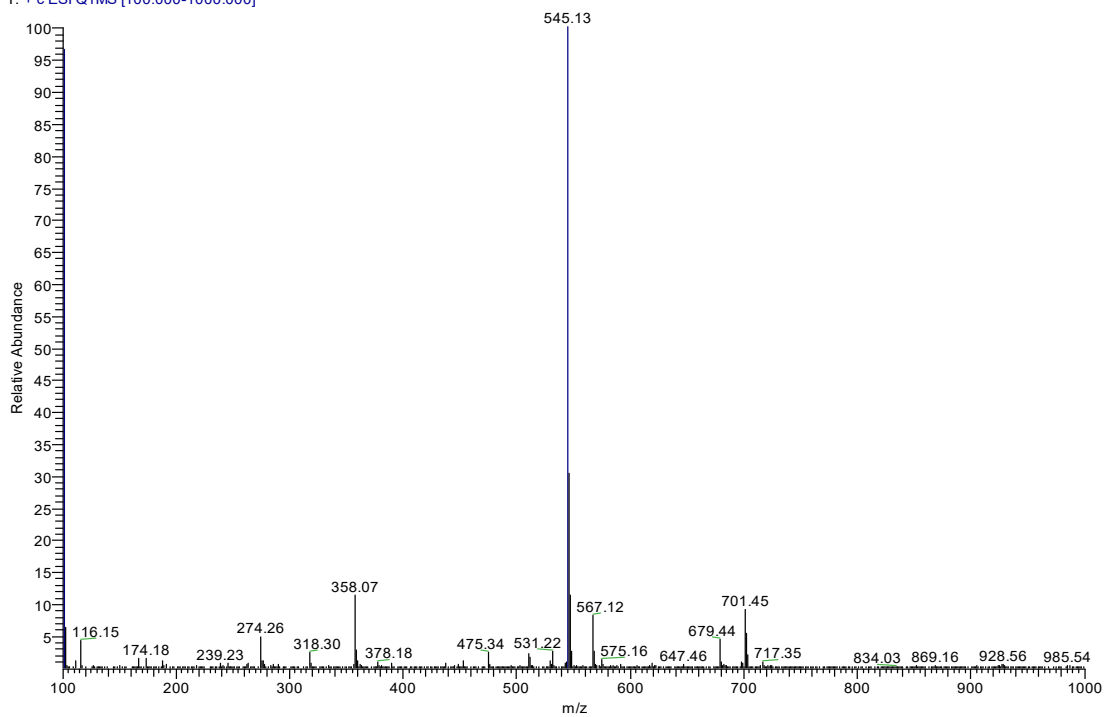

Fig. 67 MS spectrum of 1c.

20210421-81-4 #14-18 RT: 0.22-0.29 AV: 5 SB: 8 0.04-0.15 NL: 1.82E8  
T: + c ESI Q1MS [100.000-1000.000]

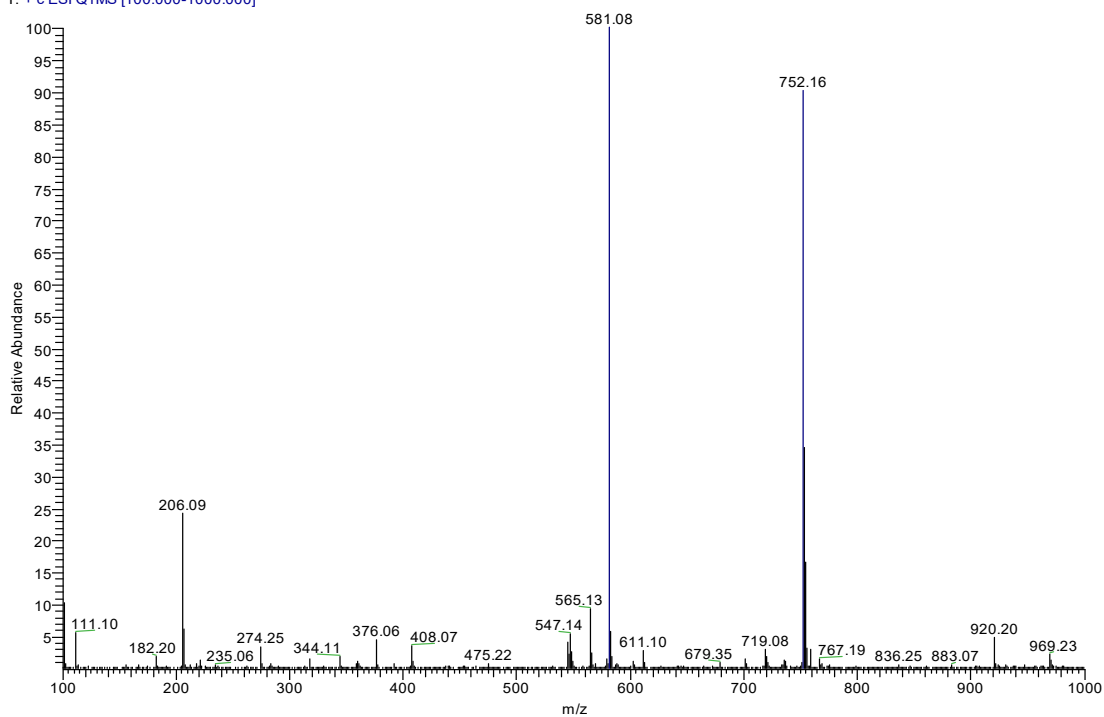

Fig. 68 MS spectrum of 1d.

20210421-81-5 #15-19 RT: 0.24-0.30 AV: 5 SB: 8 0.04-0.15 NL: 2.04E8  
T: + c ESI Q1MS [100.000-1000.000]

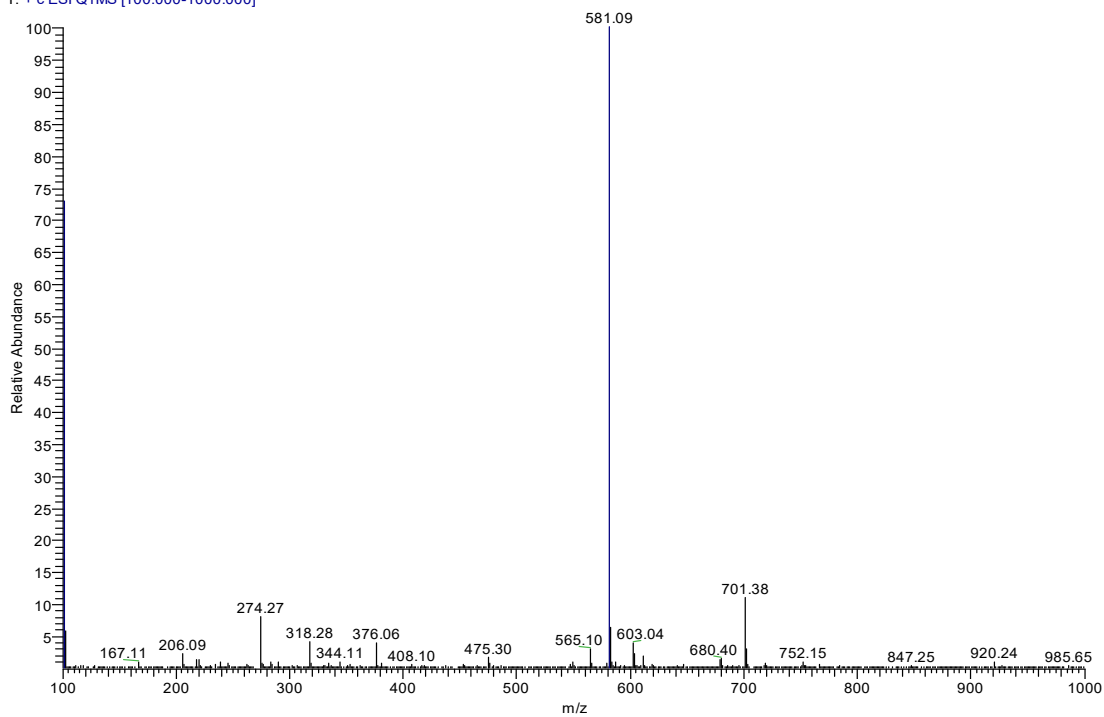

Fig. 69 MS spectrum of 1e.

20210421-81-6 #12-17 RT: 0.19-0.28 AV: 6 SB: 9 0.03-0.16 NL: 7.11E7  
T: + c ESI Q1MS [100.000-1000.000]

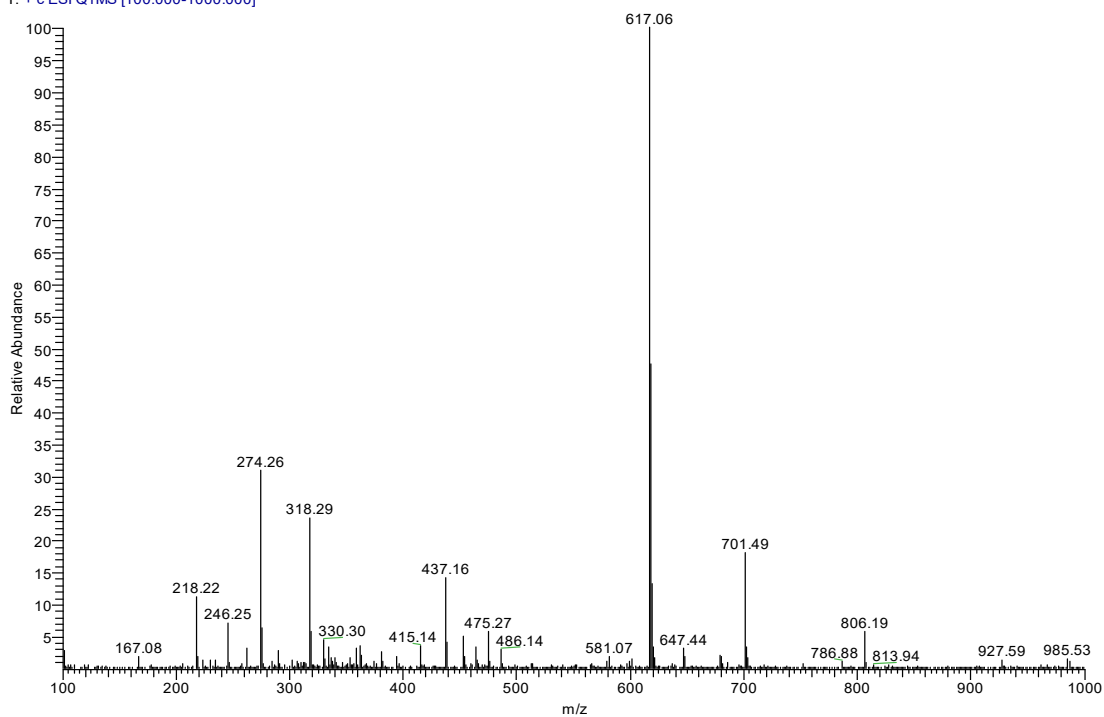

Fig. 70 MS spectrum of **1f**.

20210421-81-7 #13-17 RT: 0.20-0.27 AV: 5 SB: 8 0.04-0.15 NL: 6.92E7  
T: + c ESI Q1MS [100.000-1000.000]

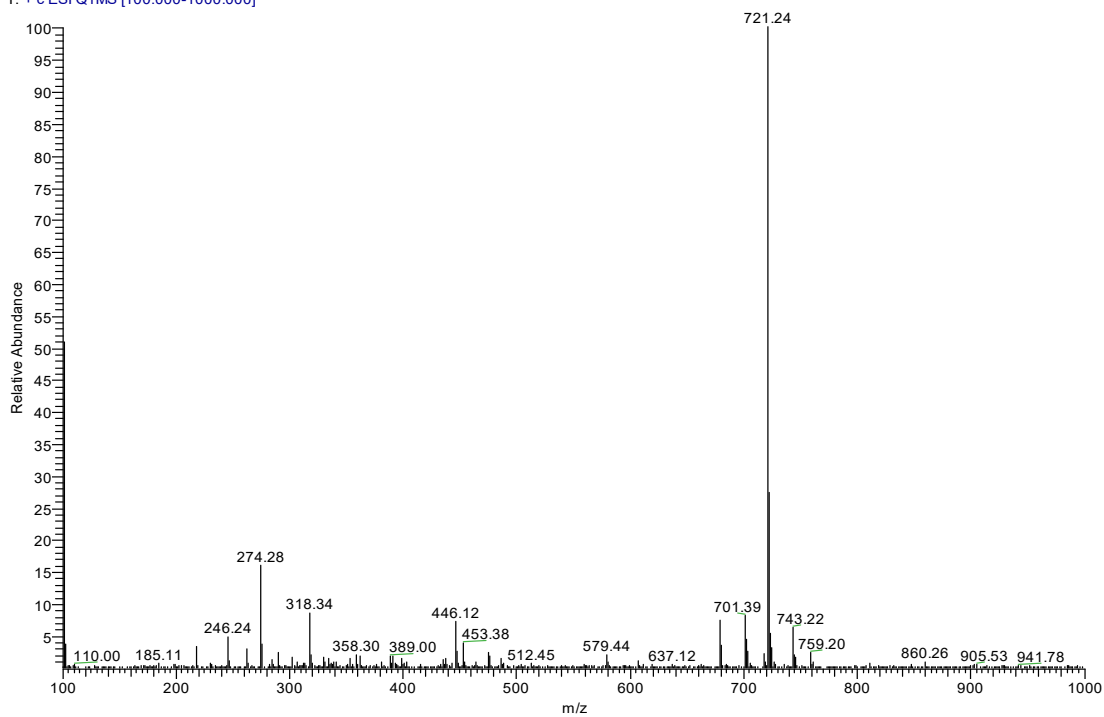

Fig. 71 MS spectrum of **1g**.

20210421-81-8 #13-18 RT: 0.21-0.30 AV: 6 SB: 9 0.03-0.16 NL: 9.06E7  
T: + c ESI Q1MS [100.000-1000.000]

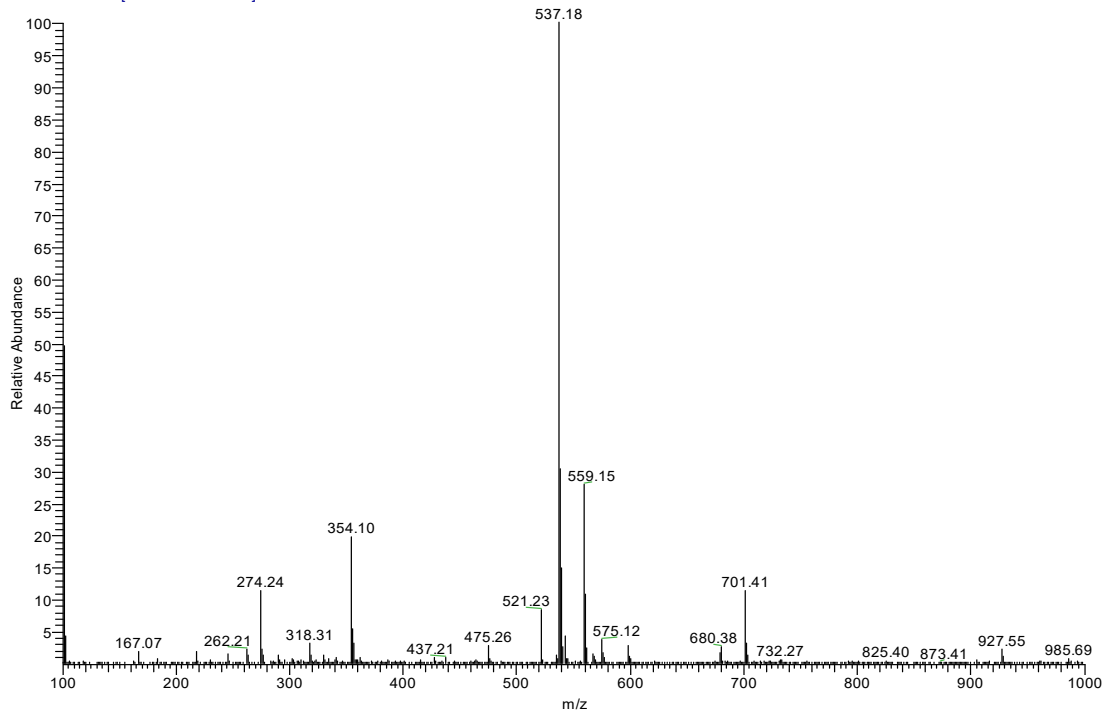

Fig. 72 MS spectrum of 1h.

20210421-81-9 #15-19 RT: 0.25-0.31 AV: 5 SB: 9 0.03-0.16 NL: 1.41E8  
T: + c ESI Q1MS [100.000-1000.000]

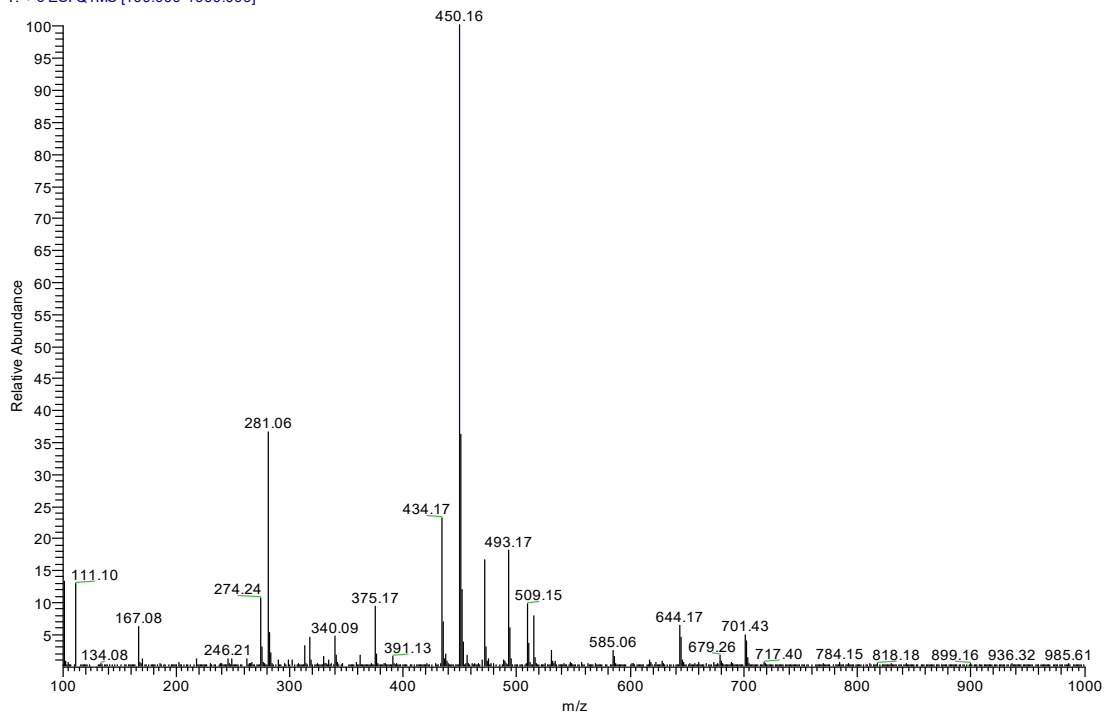

Fig. 73 MS spectrum of 2a.

20210421-81-10 #13-18 RT: 0.20-0.29 AV: 6 SB: 8 0.04-0.15 NL: 7.53E7  
T: + c ESI Q1MS [100.000-1000.000]

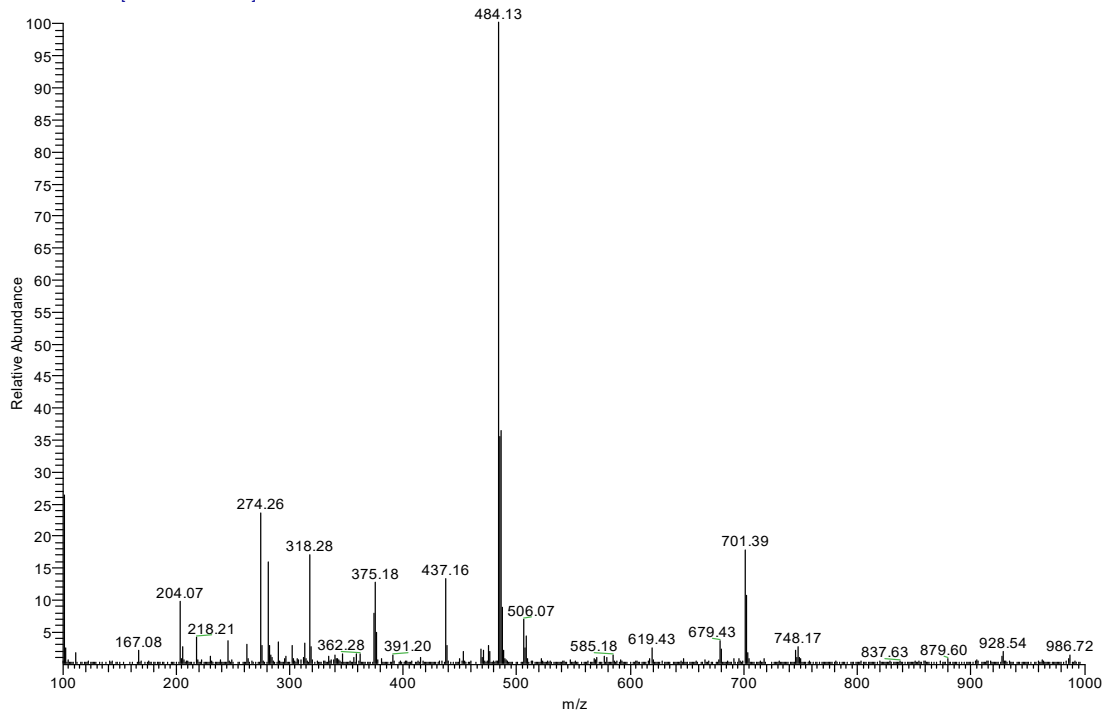

Fig. 74 MS spectrum of **2b**.

20210421-81-11 #13-19 RT: 0.21-0.31 AV: 7 SB: 8 0.04-0.16 NL: 1.23E8  
T: + c ESI Q1MS [100.000-1000.000]

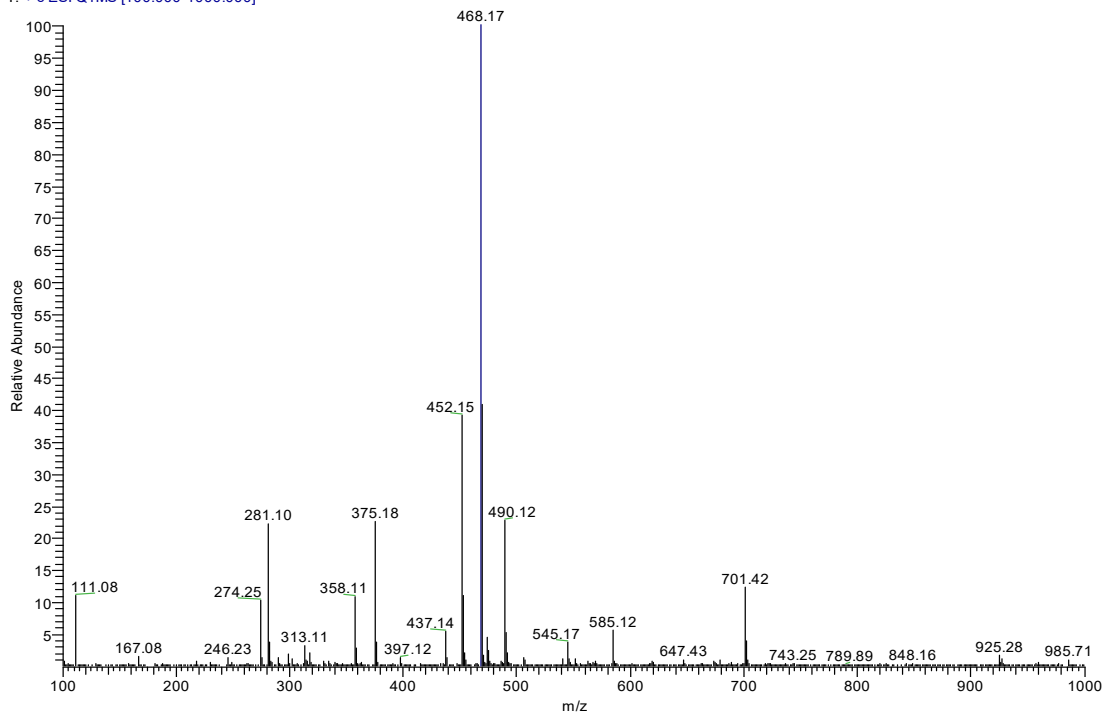

Fig. 75 MS spectrum of **2c**.

20210421-81-12 #12-21 RT: 0.19-0.34 AV: 10 SB: 8 0.04-0.16 NL: 1.62E8  
T: + c ESI Q1MS [100.000-1000.000]

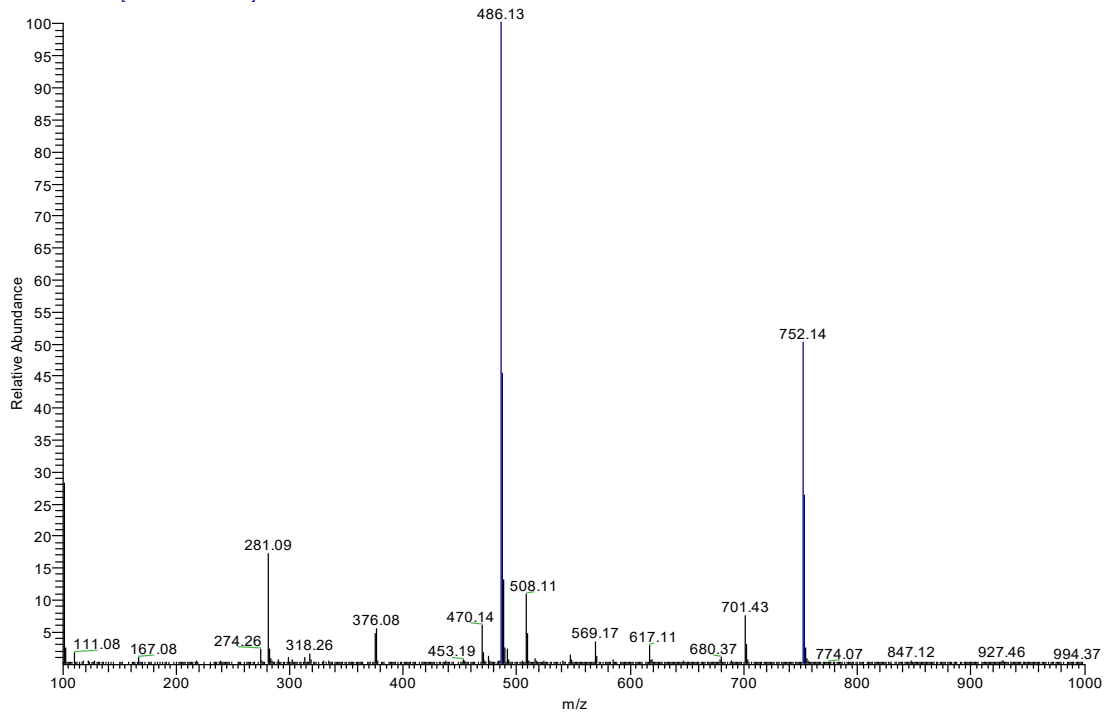

Fig. 76 MS spectrum of 2d.

20210421-81-13 #14-24 RT: 0.22-0.39 AV: 11 SB: 8 0.04-0.16 NL: 1.50E8  
T: + c ESI Q1MS [100.000-1000.000]

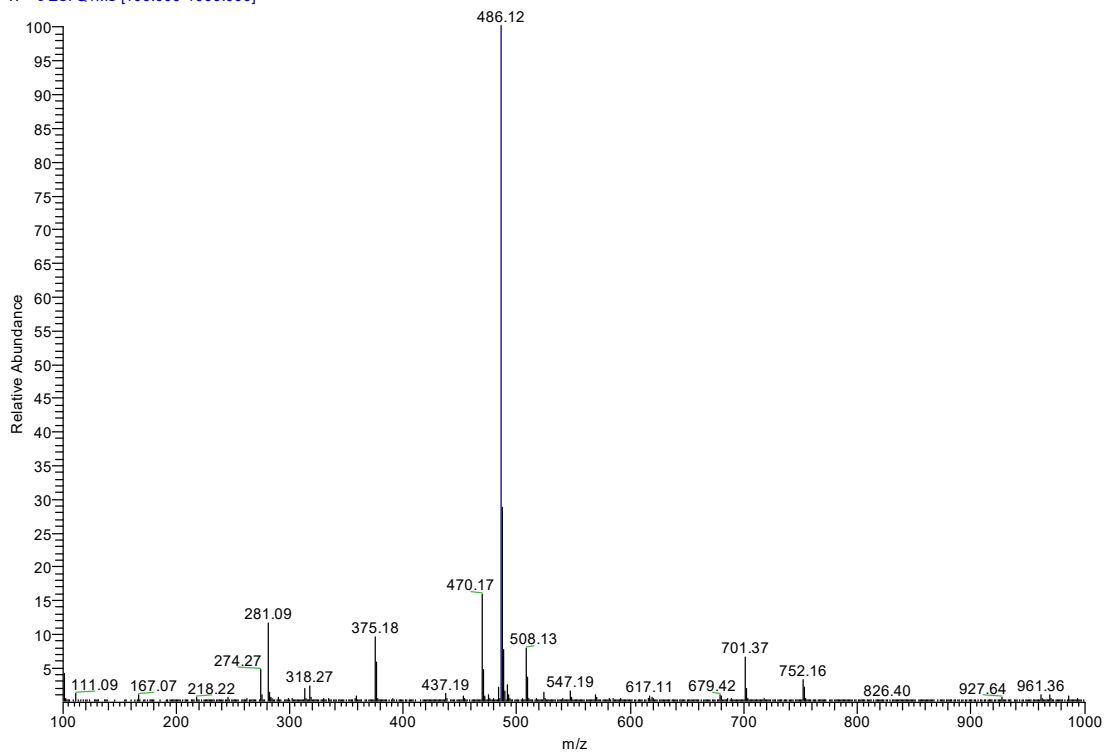



Fig. 77 MS spectrum of **2e**.

20210421-81-14 #13-19 RT: 0.21-0.31 AV: 7 SB: 8 0.04-0.16 NL: 9.75E7  
T: + c ESI Q1MS [100.000-1000.000]

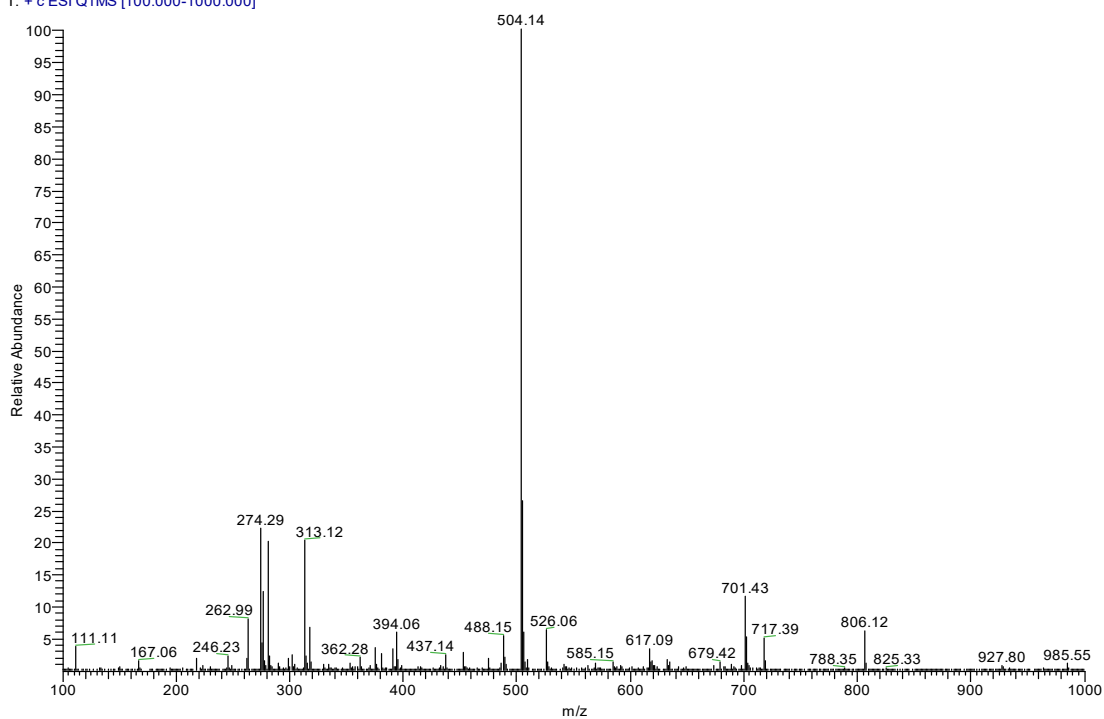

Fig. 78 MS spectrum of **2f**.

20210421-81-15 #14-22 RT: 0.22-0.35 AV: 9 SB: 8 0.04-0.15 NL: 1.69E8  
T: + c ESI Q1MS [100.000-1000.000]

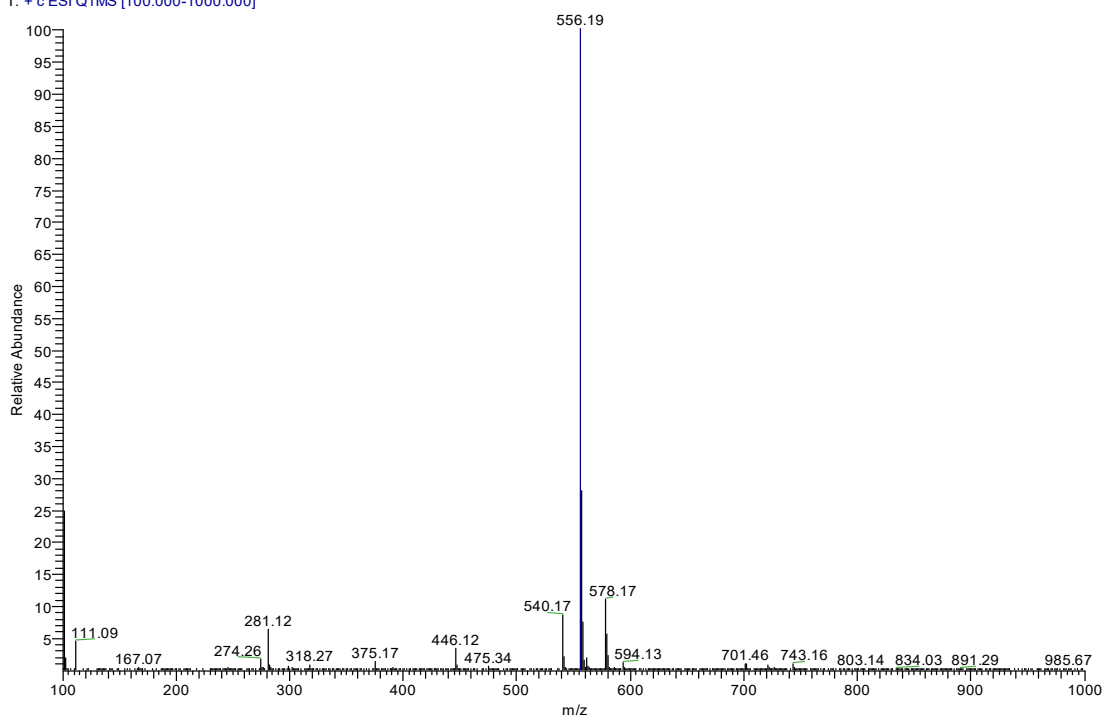

Fig. 79 MS spectrum of **2g**.

20210421-81-16 #14-21 RT: 0.22-0.34 AV: 8 SB: 8 0.04-0.15 NL: 2.28E8  
T: + c ESI Q1MS [100.000-1000.000]

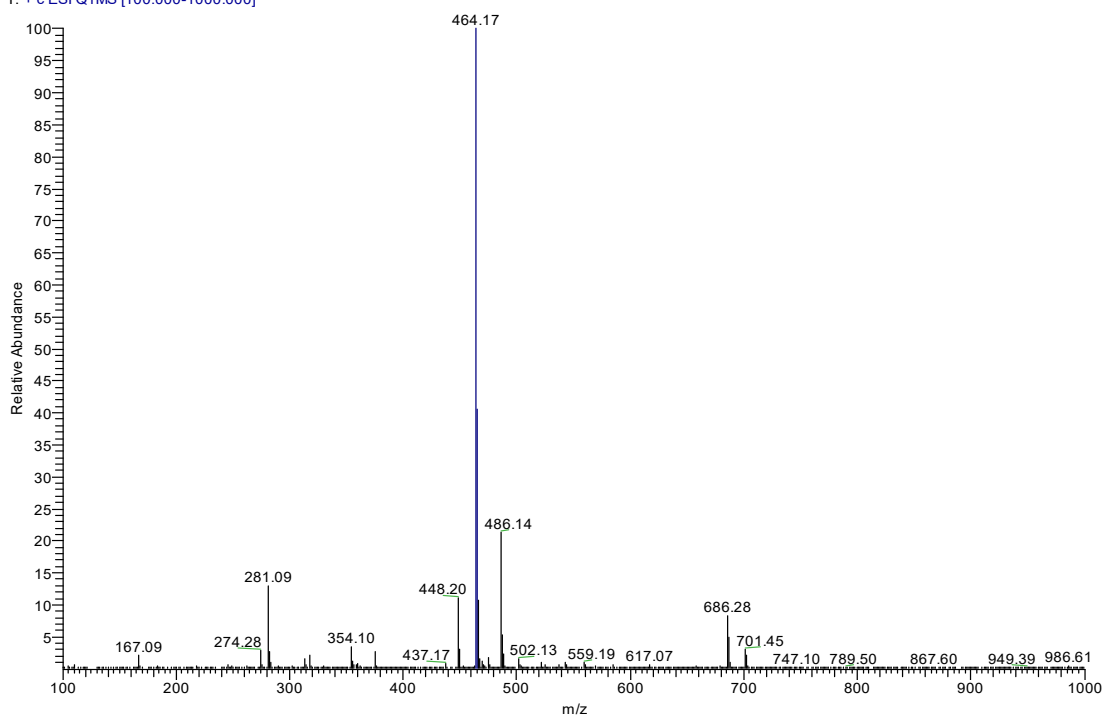

Fig. 80 MS spectrum of **2h**.
